# Supplementary material for: Archaeome structure and function of the intestinal tract in healthy and H1N1 infected swine
Source: Front Microbiol. 2023 Sep 13;14:1250140. doi: 10.3389/fmicb.2023.1250140 (PMC10534045; doi:10.3389/fmicb.2023.1250140)
Supplement: Supplementary file 1 [file Table_1.xlsx]

## Sheet: raw_data
raw_data Bacteria+Archaea
seq_id	shed	earmark	sex	day	sampletype	X28.4	A2	Acaricomes	Acetanaerobacterium	Acetitomaculum	Acidaminococcus	Acidibacter	Acinetobacter	Actinobacillus	Actinomyces	Aerococcus	Aeromicrobium	Agathobacter	Akkermansia	Alistipes	Alkanindiges	Allisonella	Alloprevotella	Allorhizobium.Neorhizobium.Pararhizobium.Rhizobium	Anaerococcus	Anaerofilum	Anaerofustis	Anaeroglobus	Anaeroplasma	Anaerosporobacter	Anaerostipes	Anaerotruncus	Anaerovibrio	Anaerovorax	Angelakisella	Aphanizomenon_NIES81	Arcanobacterium	Arcobacter	Arthrobacter	Asaccharospora	ASF356	Asteroleplasma	ATCC.39006	Atopobacter	Atopobium	Bacillus	Bacteroides	Bdellovibrio	Bergeyella
1.10.	233	7936	f	30	feces	0	0	0	0	0.000647076	0.0253492	0	0	0	0	0	0	0.0168321	0	0.000194123	0	0.00067943	0.0148585	0	0	0.000388246	0	0	0	0	0	0	0.00632517	0	0.000291184	0	0	0	0	0	0	0.000323538	0	0	6.47e-05	0	6.47e-05	0	0
1.18.	233	7444	m	30	feces	0	0	0	0	0.000485295	0.00246499	0	0	0	0	0	0	0.0217612	0	6.16e-05	0	0.000508404	0.00458334	0	0	0.000415967	2.31e-05	2.31e-05	0.000246499	0	0.000269608	0	0.00556934	0	0.000377452	0	0	0	0	0	0	0.000377452	0	0	6.16e-05	0	0.000631654	0	0
1.28.	233	7460	m	30	feces	0	0	0	0	0.000379475	0.00201596	0	0	0	0	0	0	0.00540752	0	0	0	0.000379475	0.0118467	0	0	0.000699657	0	0	0.000569213	9.49e-05	0.000343899	0	0.00268004	0	0.000272748	0	0	0	0	0	0	0.000201596	0	0	4.74e-05	0	0.000604789	0	0
4.4.	211	7370	m	7	feces	0	0	0	0	0.000433315	0.0074772	0	0	0	0	0	0	0.0379402	0	7.05e-05	0	0.000453469	0.035814	0	0	0.000695319	0	0	7.05e-05	0	0.00245881	0	0.00785005	0	0.000191465	0	0	0	0	0.000181388	0	0.000806167	0	0	0	0	9.07e-05	0	0
5.9.	213	7367	m	25	feces	0.000158079	0	0	2.37e-05	0.00176258	0	0	0	0	0	0	0	0.00214987	0	0.000497949	0	0.000276638	0.0284779	0	0	0.00155708	3.16e-05	0	0.00107494	0.0010038	0.00344612	0	0.00527194	0.000205503	0.000545373	0	0	0	0	3.16e-05	0	0.000110655	2.37e-05	0	0	0	0.00503482	0	0
5.18.	213	7402	f	25	feces	0	0	0	0	0.00258529	0.000111657	0	0	0	0	0	0	0.00238774	0	6.01e-05	0	0.000334971	0.019686	0	0	0.00162332	0	0	0.00174357	0.000549696	0.00355585	0	0.00233621	0.000292026	0.000463806	0	0	0	0	0	0	0.000352149	0	0	0	0	0.00114234	0	0
6.1.	233	7936	f	30	colon_distal	0	0	0	0	0.000941086	0.0216365	0	0	0	0	0	0	0.0131837	0	0.000349181	0	0.000506739	0.028684	0	0	0.000681329	0	0	0	0	0	0	0.0169055	0	0.000306598	0	0	0	0	0	0	0.000634488	0	0	7.66e-05	0	9.37e-05	0	0
6.2.	233	7936	f	30	colon_proximal	0	0	0	0	0.000837086	0.0132457	0	0	0	0	0	0	0.0144185	0	0.000371541	0	0.000143245	0.0513487	0	0	0.000622219	0	0	0	0	0	0	0.0225028	0	0.000241725	0	0	0	0	4.03e-05	0	0.00109672	0	0	3.58e-05	0	8.95e-05	0	0
6.3.	233	7936	f	30	ileum	0	0	0	0	2.07e-05	0.000331044	0	0	0.000365527	0	0	0	0	0	0	0	0	5.52e-05	6.21e-05	0	0	0	0	0	0	0	0	3.45e-05	0	0	0	0	0	0	0	0	0	0	0	1.38e-05	2.07e-05	6.21e-05	0	0
6.4.	233	7444	m	30	colon_distal	0	0	0	0	0.000710273	0.000727388	0	0	0	0	0	0	0.00413327	0	3e-05	0	0.000201101	0.010898	0	0	0.00115098	8.13e-05	0	0.00135209	2.14e-05	0.000175429	0	0.00276407	0.000119805	0.0003423	0	0	0	0	4.71e-05	0	0.00037653	0	0	8.56e-05	0	0.000783012	0	0
6.5.	233	7444	m	30	colon_proximal	5.31e-05	0	0	0	0.000923871	0.000584056	0	0	0	0	0	0	0.00745999	0	2.65e-05	0	4.78e-05	0.021934	0	0	0.00164598	0	0	0.00245304	3.72e-05	0.000207075	0	0.00876615	0.000297338	0.000345124	0	0	0	0	3.19e-05	0	0.000276099	0	0	6.9e-05	0	0.00107785	0	0
6.6.	233	7444	m	30	ileum	0	0	0	0	1.29e-05	0	0	0	0.00160031	0	0	0	0.000103246	0	0	0	0	0.000174227	0	0	0	0	0	0	0	0	0	5.16e-05	0	0	0	0	0	0	0	0	0	0	0	0	0	0	0	0
6.7.	233	7460	m	30	colon_distal	0	0	0	0	0.00115102	0.00256806	0	0	3.07e-05	0	0	0	0.00844085	0	3.58e-05	0	0.000127892	0.0179458	0	0	0.00144262	5.12e-05	0	0.00123288	0.000214858	0.000741771	0	0.00763257	8.19e-05	0.000276246	0	0	0	0	1.53e-05	0	0.000434832	0	0	8.7e-05	0	0.000199511	0	0
6.8.	233	7460	m	30	colon_proximal	0	0	0	0	0.00116467	0.0028657	0	0	0	0	0	0	0.00948594	0	0	0	0.00019922	0.0179451	0	0	0.00144051	0	0	0.00107272	0.000314155	0.000950126	0	0.00787685	6.9e-05	0.000222207	0	0	0	0	0	0	0.000321817	0	0	5.36e-05	0	0.000137922	0	0
6.9.	233	7460	m	30	ileum	0	1.23e-05	0	0	0	0	0	1.85e-05	0.00321779	1.23e-05	0	3.7e-05	0	0	0	0	0	3.7e-05	0	0	0	0	0	0	0	0	0	0	0	0	0	0	0	9.86e-05	0	0	0	0	0	4.32e-05	0	0	0	0
6.10.	211	7370	m	7	colon_distal	0	0	0	0	0.000257431	0.0087198	0	0	0	0	0	0	0.0367962	0	2.74e-05	0	0.000356022	0.0489996	0	0	0.000772294	1.1e-05	1.64e-05	4.38e-05	0	0.00301249	0	0.0203535	8.76e-05	0.000202659	0	0	0	0	0	0	0.000525817	0	0	0	1.1e-05	4.93e-05	0	0
6.11.	211	7370	m	7	colon_proximal	0	0	0	0	0.000205573	0.00512265	0	0	0	0	0	0	0.0247854	0	2.22e-05	0	0.000266689	0.0715171	0	0	0.00117232	0	0	3.89e-05	2.22e-05	0.00271689	0	0.0135956	8.89e-05	0.000216685	0	0	0	0	1.67e-05	0	0.000744506	0	1.67e-05	0	0	3.89e-05	0	0
6.12.	213	7367	m	25	colon_distal	0.000172538	0	0	0	0.00234874	0	0	0	0	0	0	0	0.00214837	0	0.000712413	0	0.000239326	0.0277563	0	0	0.00154727	6.68e-05	0	0.000996265	0.000779202	0.0031502	0	0.00469191	0.00037847	0.000851556	0	0	0	0	0.000105749	0	0.000105749	0	0	0	0	0.00542102	0	0
6.13.	213	7367	m	25	colon_proximal	0.000172789	0	0	0	0.00138231	0	0	0	2.59e-05	0	0	0	0.00686837	0	0.000414694	0	0.000172789	0.0418323	0	0	0.00165878	3.46e-05	0	0.00148599	0.000881225	0.00342122	0	0.00913191	0.000181429	0.000181429	0	0	0	0	2.59e-05	0	0.000138231	0	0	0	0	0.00684245	0	0
6.14.	213	7367	m	25	ileum	0	0	0	0	0.000415741	0	0	0.00282224	0.02249	0.000359776	0	0	0.00642799	0	9.59e-05	8e-05	0	0.0236972	6.4e-05	0	0.000263835	1.6e-05	0	0.000815491	0.00019188	0.0014391	0	0.00269432	0	0.00014391	0	4e-05	0	0.000119925	4.8e-05	0	3.2e-05	0	0	0	0	0.00271031	0	5.6e-05
6.15.	213	7402	f	25	colon_distal	0	0	0	0	0.00222384	0.000253596	0	0	0	0	0	0	0.00253596	0	0.000123547	0	0.000292611	0.022479	0	0	0.00143054	0	0	0.00241241	0.000507192	0.00366088	0	0.00271152	0.000292611	0.000500689	0	0	0	0	0	1.95e-05	0.000221084	0	0	0	0	0.000890837	0	0
6.16.	213	7402	f	25	colon_proximal	9.64e-05	0	0	0	0.00250648	0.000139249	0	0	0	0	0	0	0.00296707	0	0.000117826	0	0.000246363	0.0266822	0	0	0.00216371	0	0	0.00182095	0.00104972	0.00366332	0	0.00389897	0.000128537	0.000310632	0	0	0	0	0	0	0.000139249	0	0	0	0	0.00132822	0	0
6.17.	213	7402	f	25	ileum	0	0	0	0	0	5.59e-05	0	7.19e-05	0.00192464	4.79e-05	0	0	0.000726733	0	0	0	0	0.00179687	5.59e-05	0	0.000151735	0	0	3.99e-05	0	0.000119791	0	8.78e-05	0	5.59e-05	0	0	3.19e-05	0	0	0	7.99e-05	0	0	0	3.19e-05	9.58e-05	0	0
Bacteria >1%, Archaea
seq_id	shed	earmark	sex	day	sampletype	Alloprevotella	Blautia	Clostridium_sen._str.	Lachnospira spec.	Lactobacillus	Megasphaera	Methanobrevibacter	Methanosphaera	Methanomethylophilaceae	Not_assigned	Prevotella spec.	Phascolarctobacterium	Rikenellaceae_RC9_gut_group	Romboutsia	Ruminococcus spec.	Streptococcus	Subdoligranulum	Terrisporobacter	Treponema_2	Turicibacter	Agathobacter	rare genera
1.10.	233	7936	f	30	feces	0.0148585	0.0148504	0.0258831	0.0206741	0.118383	0.0393584	0.0277515	0.0338987	3.23538e-05	0.143061	0.143303	0.0076355	0.0210704	0.00207064	0.0787411	0.0347804	0.0196064	0.0118253	0.0190968	0.00104341	0.0168321	0.205245
1.18.	233	7444	m	30	feces	0.00458334	0.0147437	0.0903496	0.0212682	0.116355	0.0299727	0.0576268	0.0357732	6.93278e-05	0.110539	0.109107	0.0111695	0.0330309	0.00940547	0.0676254	0.0622179	0.028486	0.0298649	0.00743348	0.0110539	0.0217612	0.127563
1.28.	233	7460	m	30	feces	0.0118467	0.0123685	0.0563283	0.0181081	0.121574	0.0180251	0.0618307	0.0334175	0.000237172	0.124705	0.131737	0.0121551	0.0338207	0.00904811	0.0816109	0.0631115	0.0229582	0.0204205	0.0190093	0.0119416	0.00540752	0.130338
4.4.	211	7370	m	7	feces	0.035814	0.0118607	0.0427571	0.0222704	0.147508	0.0344939	0.029153	0.00888799	0.00404091	0.153514	0.174596	0.0153071	0.0265431	0.00443392	0.0661057	0.000251927	0.0421726	0.00894846	0.00510908	0.00327505	0.0379402	0.125016
5.9.	213	7367	m	25	feces	0.0284779	0.0156182	0.0619354	0.0180763	0.0774429	0.00493207	0.0412033	0.0262806	0.00135158	0.193829	0.144587	0.0242809	0.0355915	0.0108363	0.0821695	0.00837028	0.0181633	0.0255377	0.0127491	0.0115635	0.00214987	0.154854
5.18.	213	7402	f	25	feces	0.019686	0.0178222	0.0547291	0.0192565	0.0629316	0.00432886	0.033248	0.0288161	0.000953379	0.171926	0.162555	0.0185694	0.0364517	0.0136136	0.0848937	0.0219535	0.0217817	0.0318222	0.0225204	0.0104013	0.00238774	0.159352
6.1.	233	7936	f	30	colon_distal	0.028684	0.0124726	0.0247578	0.0203121	0.109187	0.0322354	0.0155897	0.0303021	0.000485447	0.168697	0.165359	0.00971746	0.0209509	0.00263589	0.0694317	0.0211084	0.0186982	0.0143037	0.0136862	0.00194179	0.0131837	0.20626
6.2.	233	7936	f	30	colon_proximal	0.0513487	0.010524	0.0192082	0.0237025	0.0935925	0.0246381	0.00454802	0.015081	0.000644601	0.183537	0.200717	0.013559	0.0223417	0.00209048	0.0529558	0.0107299	0.0137022	0.0117103	0.0113477	0.00251573	0.0144185	0.217087
6.3.	233	7936	f	30	ileum	5.52e-05	0.000862093	0.207737	0.00633132	0.340575	0.0321319	0.00111038	0.00235179	0	0.0236972	0.00121384	0	4.14e-05	0.0855541	0.00114491	0.00428288	0.00108968	0.113693	0	0.0664639	0	0.111665
6.4.	233	7444	m	30	colon_distal	0.010898	0.0146462	0.0371053	0.0265497	0.160291	0.0279916	0.0352869	0.0289115	0.00058191	0.148909	0.152011	0.0149885	0.0358559	0.00417178	0.0748739	0.033815	0.0224677	0.0196823	0.00851044	0.00519013	0.00413327	0.133129
6.5.	233	7444	m	30	colon_proximal	0.021934	0.0108369	0.0337425	0.0217535	0.123873	0.0265639	0.0203358	0.0200119	0.000918561	0.182571	0.170428	0.0187641	0.0487528	0.00297869	0.0710584	0.0215995	0.0213127	0.0155678	0.0109803	0.00555915	0.00745999	0.142998
6.6.	233	7444	m	30	ileum	0.000174227	0.000206492	0.382758	0.0225205	0.0196038	0.000174227	0.000374266	0.000445247	0	0.00603988	0.000832369	7.74e-05	0.000129057	0.120294	0.000213	0.0303026	0.000303285	0.156482	2.58e-05	0.210415	0.000103246	0.0485256
6.7.	233	7460	m	30	colon_distal	0.0179458	0.0107276	0.0276502	0.0186006	0.0825054	0.0276502	0.0134491	0.0154698	0.000624111	0.162197	0.186195	0.0132649	0.0396259	0.00200534	0.0686778	0.0896162	0.0190814	0.0115307	0.0308884	0.00505428	0.00844085	0.148799
6.8.	233	7460	m	30	colon_proximal	0.0179451	0.0127271	0.0318369	0.0187956	0.125057	0.0284578	0.0218376	0.0234696	0.000337141	0.132788	0.174088	0.0136389	0.0272778	0.00358596	0.0683095	0.0846532	0.0241209	0.0147346	0.021761	0.0050418	0.00948594	0.140052
6.9.	233	7460	m	30	ileum	3.7e-05	7.4e-05	0.501741	0.000265081	0.00694106	3.08e-05	0.000160273	0.000166438	0	0.0375902	0.0001294	0	0	0.0391128	0	0.0244232	4.32e-05	0.177626	4.93e-05	0.194757	0	0.0168533
6.10.	211	7370	m	7	colon_distal	0.0489996	0.0136877	0.0348244	0.0220734	0.136181	0.0334661	0.0123841	0.00880196	0.00203754	0.155478	0.169948	0.0213504	0.0296046	0.00566349	0.0689861	8.76e-05	0.0453024	0.0107683	0.00362047	0.00298511	0.0367962	0.136953
6.11.	211	7370	m	7	colon_proximal	0.0715171	0.0133122	0.0264078	0.0208351	0.0997805	0.0246298	0.0046115	0.00347807	0.00333917	0.195772	0.185665	0.0200128	0.0330916	0.0037392	0.0543045	0.000116676	0.0406645	0.00984527	0.00358363	0.00325027	0.0247854	0.157258
6.12.	213	7367	m	25	colon_distal	0.0277563	0.0155451	0.0508262	0.0201424	0.0972054	0.00354537	0.0251849	0.0186285	0.00129681	0.211019	0.142945	0.022736	0.039205	0.00928364	0.0840314	0.00707961	0.0139811	0.0230254	0.0141314	0.00825398	0.00214837	0.162029
6.13.	213	7367	m	25	colon_proximal	0.0418323	0.0133134	0.0634914	0.0236462	0.0896171	0.00344714	0.0256678	0.0169765	0.00144279	0.207814	0.154957	0.0214431	0.0366572	0.0115078	0.0681135	0.00355082	0.01397	0.024968	0.0158361	0.0075768	0.00686837	0.147303
6.14.	213	7367	m	25	ileum	0.0236972	0.00274229	0.406714	0.00382178	0.0287581	0.000375766	0.00363773	0.00331793	0.000399751	0.0618734	0.0717232	0.00338189	0.00599626	0.0809415	0.011265	0.0102256	0.00501287	0.106781	0.00207071	0.0832121	0.00642799	0.0776233
6.15.	213	7402	f	25	colon_distal	0.022479	0.0172575	0.060811	0.0226936	0.0427732	0.00315369	0.036999	0.0258278	0.00115094	0.166879	0.177029	0.0192993	0.0366869	0.0130309	0.087237	0.0220433	0.0231618	0.0306721	0.0232463	0.00959763	0.00253596	0.155435
6.16.	213	7402	f	25	colon_proximal	0.0266822	0.0154673	0.0570064	0.0246899	0.0650292	0.00310632	0.0381542	0.0265644	0.000953319	0.172658	0.167131	0.0212087	0.0324664	0.010915	0.0758371	0.014589	0.0215729	0.0342659	0.0279141	0.00861201	0.00296707	0.15221
6.17.	213	7402	f	25	ileum	0.00179687	0.000766663	0.439745	0.000846546	0.012634	0.000367359	0.00184478	0.00226006	2.39582e-05	0.0574438	0.0159881	0.000838538	0.00139756	0.123193	0.00231593	0.00920794	0.00186075	0.141282	0.000910412	0.126324	0.000726733	0.0582265
[truncated: 313 more columns]

## Sheet: alpha_diversity
Seq_ID	shed	earmark	sex	status	sampletype	sampletype_2	day	ASVs_total	ASVs_archaeal	percentage_archaeal_ASVs
1.10.	233	7936	f	healthy	feces	feces	30	789	5	0.633714
1.18.	233	7444	m	healthy	feces	feces	30	833	6	0.720288
1.28.	233	7460	m	healthy	feces	feces	30	719	6	0.834492
4.4.	211	7370	m	infected	feces	feces	7	751	9	1.1984
5.9.	213	7367	m	infected	feces	feces	25	1056	5	0.473485
5.18.	213	7402	f	infected	feces	feces	25	1060	5	0.471698
6.1.	233	7936	f	healthy	colon_distal	intestinal	30	1072	5	0.466418
6.2.	233	7936	f	healthy	colon_proximal	intestinal	30	1070	4	0.373832
6.3.	233	7936	f	healthy	ileum	intestinal	30	553	3	0.542495
6.4.	233	7444	m	healthy	colon_distal	intestinal	30	1177	9	0.764656
6.5.	233	7444	m	healthy	colon_proximal	intestinal	30	1060	7	0.660377
6.6.	233	7444	m	healthy	ileum	intestinal	30	264	2	0.757576
6.7.	233	7460	m	healthy	colon_distal	intestinal	30	1095	7	0.639269
6.8.	233	7460	m	healthy	colon_proximal	intestinal	30	811	8	0.986436
6.9.	233	7460	m	healthy	ileum	intestinal	30	565	3	0.530973
6.10.	211	7370	m	infected	colon_distal	intestinal	7	899	8	0.889878
6.11.	211	7370	m	infected	colon_proximal	intestinal	7	925	6	0.648649
6.12.	213	7367	m	infected	colon_distal	intestinal	25	1088	6	0.551471
6.13.	213	7367	m	infected	colon_proximal	intestinal	25	968	6	0.619835
6.14.	213	7367	m	infected	ileum	intestinal	25	626	5	0.798722
6.15.	213	7402	f	infected	colon_distal	intestinal	25	1085	7	0.645161
6.16.	213	7402	f	infected	colon_proximal	intestinal	25	850	5	0.588235
6.17.	213	7402	f	infected	ileum	intestinal	25	880	4	0.454545

## Sheet: beta_diversity_sorted_sum
	Euryarchaeota			Firmicutes													Bacteroidetes			Spirochaetes
	Methanobrevibacter	Methanosphaera	Methanomethylophilaceae	Clostridium	Lactobacillus	Ruminococcus spec.	Terrisporobacter	Turicibacter	Romboutsia	Streptococcus	Subdoligranulum	Megasphaera	Lachnospira spec.	Phascolarctobacterium	Blautia	Agathobacter	Prevotella spec.	Rikenellaceae_RC9	Alloprevotella	Treponema_2	rare genera	Not assigned
ileum	0.212571	0.193355	0.0752575	35.0897	3.35435	1.34807	11.8403	12.3592	7.34562	1.48552	0.957692	0.51156	0.827696	0.486212	0.342033	0.640867	5.48677	0.812291	1.94445	0.132797	7.16973	7.17438
colon_proximal	1.9915	1.63627	0.0948225	7.13662	14.6722	5.65114	3.56662	1.60398	2.00342	2.14605	2.12281	2.11955	1.59105	1.60675	1.11491	1.05963	13.9628	2.91334	2.62414	1.3352	13.853	14.5834
colon_distal	2.18429	2.23701	0.0797303	3.66965	9.75924	7.00352	1.84874	0.542559	0.553634	3.07321	1.85154	1.98691	1.72048	1.55942	1.35288	0.747677	17.0709	3.24444	2.65186	1.69684	17.0457	17.354
feces	4.18022	2.78457	0.111412	5.52369	10.7366	7.24617	2.14032	0.821313	0.823467	3.17809	2.5528	2.18518	1.49835	1.48529	1.4544	1.44131	14.4314	3.10847	1.92111	1.43197	15.0395	14.9596

## Sheet: nmds_data
	Seq_ID	earmark	day	sex	status	sample type	subsampletype	ASV_1	ASV_2	ASV_3	ASV_4	ASV_5	ASV_6	ASV_7	ASV_8	ASV_9	ASV_10	ASV_11	ASV_12	ASV_13	ASV_14	ASV_15	ASV_16	ASV_17	ASV_18	ASV_19	ASV_20	ASV_21	ASV_22	ASV_23	ASV_24	ASV_25	ASV_26	ASV_27	ASV_28	ASV_29	ASV_30	ASV_31	ASV_32	ASV_33	ASV_34	ASV_35	ASV_36	ASV_37	ASV_38	ASV_39	ASV_40	ASV_41	ASV_42
1	1.1.	7936	0	f	healthy	feces	feces	1851	2297	85	934	0	0	0	7	0	7	62	0	0	0	0	0	0	0	0	0	0	0	0	0	0	0	0	0	0	0	0	0	0	0	0	0	0	0	0	0	0	0
2	1.2.	7936	2	f	healthy	feces	feces	5201	2269	366	0	0	13	0	23	18	29	56	0	0	0	0	0	0	0	0	0	0	0	0	0	0	0	0	0	0	0	0	0	0	0	0	0	0	0	0	0	0	0
3	1.3.	7936	4	f	healthy	feces	feces	2828	2711	337	24	0	8	0	16	0	0	114	0	0	0	0	0	0	0	0	0	0	0	0	0	0	0	0	0	0	0	0	0	0	0	0	0	0	0	0	0	0	0
4	1.4.	7936	7	f	healthy	feces	feces	320	2233	0	1718	0	0	0	23	0	0	0	0	0	0	0	0	0	0	0	0	0	0	0	0	0	0	0	0	0	0	0	0	0	0	0	0	0	0	0	0	0	0
5	1.5.	7936	14	f	healthy	feces	feces	27	2394	0	2158	0	15	0	66	0	25	0	0	0	0	0	0	0	0	0	0	0	0	0	0	0	7	0	0	0	0	0	0	0	0	0	0	0	0	0	0	2	0
6	1.6.	7936	21	f	healthy	feces	feces	17	3487	0	3582	0	0	0	7	0	0	0	0	0	0	0	0	0	0	19	0	0	0	0	0	0	0	0	0	0	0	0	0	0	0	0	0	0	0	0	0	0	4
7	1.7.	7936	22	f	healthy	feces	feces	10	2293	0	2511	0	0	0	16	0	0	0	0	0	0	0	0	0	0	0	0	0	0	0	0	0	0	0	0	0	0	0	0	0	0	0	0	0	0	0	0	0	0
8	1.8.	7936	23	f	healthy	feces	feces	8	1786	0	1409	0	0	0	11	0	0	0	0	0	0	0	0	0	0	0	0	0	0	0	0	0	0	0	0	0	0	0	0	0	0	0	0	0	0	0	0	0	0
9	1.9.	7936	25	f	healthy	feces	feces	0	2318	0	1666	0	0	0	65	0	0	0	0	0	0	0	0	0	0	0	0	0	0	0	0	0	0	0	0	0	0	0	0	0	0	0	0	0	0	0	0	0	0
10	1.10.	7936	30	f	healthy	feces	feces	6	4191	0	3425	0	0	0	0	0	0	0	0	0	0	0	0	0	4	0	0	0	0	0	0	0	0	0	0	0	0	0	0	0	0	0	0	0	0	0	0	0	0
11	1.11.	7444	0	m	healthy	feces	feces	2930	2315	134	1271	0	46	0	40	0	41	43	0	0	0	0	0	0	0	0	0	0	0	0	0	0	0	0	0	0	0	0	0	0	0	0	0	0	0	0	0	0	0
12	1.12.	7444	4	m	healthy	feces	feces	1870	2389	167	32	0	20	0	36	6	16	92	0	0	0	0	0	0	0	0	0	0	0	0	0	0	0	0	0	0	0	0	0	0	0	0	0	0	0	0	0	0	0
13	1.13.	7444	7	m	healthy	feces	feces	3758	2612	126	0	0	69	0	89	0	0	0	0	0	0	0	0	0	0	0	0	0	0	0	0	0	0	0	0	0	0	0	0	0	0	0	0	0	0	4	0	0	0
14	1.14.	7444	21	m	healthy	feces	feces	3862	2732	541	88	0	0	0	14	0	45	26	0	0	0	0	0	0	0	0	0	0	0	0	0	0	0	0	0	0	0	0	0	0	0	0	0	0	0	0	4	0	0
15	1.15.	7444	22	m	healthy	feces	feces	2473	2146	264	46	0	36	0	106	0	155	17	0	0	0	0	0	0	0	0	0	0	0	0	0	0	0	0	0	0	0	0	0	0	0	0	0	0	0	0	0	0	0
16	1.16.	7444	23	m	healthy	feces	feces	1685	1904	210	26	0	50	0	85	0	153	0	0	0	0	0	0	0	0	0	0	0	0	0	0	0	0	0	0	0	0	0	0	0	0	0	0	0	0	0	0	0	0
17	1.17.	7444	25	m	healthy	feces	feces	3347	1685	323	67	0	81	0	107	0	147	0	0	0	0	0	0	0	0	0	0	0	0	0	0	0	0	0	0	0	0	0	0	0	0	0	0	0	0	0	0	0	0
18	1.18.	7444	30	m	healthy	feces	feces	6800	4644	577	104	0	0	0	5	0	4	0	0	0	0	0	0	0	0	0	0	0	0	0	0	0	0	0	0	0	0	0	0	0	0	0	0	0	0	0	0	0	0
19	1.19.	7460	0	m	healthy	feces	feces	5491	2791	376	0	0	20	0	0	11	10	81	0	0	0	0	0	0	0	0	0	0	0	0	0	0	0	0	0	0	0	0	0	0	0	0	0	0	0	0	0	0	0
20	1.20.	7460	2	m	healthy	feces	feces	5222	2010	408	0	0	9	0	0	8	12	79	0	0	0	0	0	0	0	0	0	0	0	0	0	7	0	0	0	0	0	0	0	0	0	0	0	0	0	0	0	0	0
21	1.21.	7460	4	m	healthy	feces	feces	2471	3107	307	83	0	0	0	5	0	0	61	0	0	0	0	0	0	0	0	13	0	0	0	0	0	0	0	0	0	0	0	0	0	0	0	0	0	0	0	0	0	0
22	1.22.	7460	7	m	healthy	feces	feces	1571	2748	285	28	0	76	0	120	0	145	41	0	0	0	0	0	0	0	0	0	0	0	0	0	0	0	0	0	0	0	0	0	0	0	0	0	0	0	0	0	0	0
23	1.23.	7460	14	m	healthy	feces	feces	1554	3667	557	133	0	32	0	84	0	172	20	0	0	0	0	0	0	0	0	0	0	0	0	0	0	0	0	0	0	0	0	0	0	0	0	0	0	0	0	0	0	0
24	1.24.	7460	21	m	healthy	feces	feces	2364	2283	892	641	0	7	0	0	0	40	9	0	0	0	0	0	0	0	0	0	0	0	0	0	0	0	0	0	0	0	0	0	0	0	0	0	0	0	0	0	0	0
25	1.25.	7460	22	m	healthy	feces	feces	1817	2107	469	267	0	16	0	44	0	34	12	0	0	0	0	0	0	0	0	0	0	0	0	0	0	0	0	0	0	0	0	0	0	0	0	0	0	0	0	0	0	0
26	1.26.	7460	23	m	healthy	feces	feces	3939	3631	418	611	0	37	0	63	0	116	0	0	0	0	0	0	0	0	0	0	0	0	0	0	0	0	0	0	0	0	0	0	0	0	0	0	0	0	0	0	0	0
27	1.27.	7460	25	m	healthy	feces	feces	3404	2242	391	676	0	49	0	101	0	345	17	0	0	0	0	0	0	0	0	0	0	0	0	0	0	0	0	0	0	0	0	0	6	0	0	0	0	0	0	0	0	0
28	1.28.	7460	30	m	healthy	feces	feces	4367	2818	536	311	0	0	0	5	0	0	0	0	0	0	0	0	0	15	0	0	0	0	0	0	0	0	0	0	0	0	0	0	0	0	0	0	0	0	0	0	0	0
29	2.1.	7370	2	m	infected	feces	feces	1014	180	73	0	0	40	0	41	0	0	0	0	0	0	0	0	0	0	0	0	0	0	0	0	0	0	0	0	0	0	0	0	0	0	0	0	0	0	0	0	0	0
30	2.2.	7370	7	m	infected	feces	feces	322	733	335	0	0	45	0	90	0	0	0	0	0	0	0	0	0	0	0	0	0	0	0	0	0	0	0	0	0	0	0	0	0	0	0	0	0	0	0	0	0	0
31	2.3.	7479	0	m	infected	feces	feces	11	67	0	0	0	0	0	13	0	0	0	0	0	0	0	0	0	0	0	0	0	0	0	0	0	0	0	0	0	0	0	0	0	0	0	0	0	0	0	0	0	0
32	2.4.	7479	2	m	infected	feces	feces	95	1399	0	0	0	22	0	60	0	0	0	0	0	0	0	0	0	0	0	0	0	0	0	0	0	0	0	0	0	0	0	0	0	0	0	0	0	0	0	0	0	0
33	2.5.	7479	4	m	infected	feces	feces	438	1249	328	0	0	40	0	36	0	0	0	0	0	0	0	0	0	0	0	0	0	0	0	0	0	0	0	0	0	0	0	0	0	0	0	0	0	0	0	0	0	0
34	2.6.	7479	7	m	infected	feces	feces	814	2223	99	0	0	0	0	6	0	0	55	0	0	0	0	4	0	0	0	0	0	0	0	0	0	0	0	0	0	0	0	0	0	0	0	0	0	0	0	0	0	0
35	2.7.	7965	0	f	infected	feces	feces	2079	501	291	0	240	27	0	14	0	0	0	0	0	0	0	0	0	10	0	0	0	0	0	0	0	0	0	0	0	0	0	0	0	0	0	0	0	0	0	0	0	0
36	2.8.	7965	2	f	infected	feces	feces	1310	537	162	0	86	123	0	78	0	13	0	0	0	0	0	0	0	0	0	0	0	0	0	0	0	0	0	0	0	0	0	0	0	0	0	0	0	0	0	0	0	0
37	2.9.	7965	4	f	infected	feces	feces	1678	1275	187	0	94	4	0	4	0	0	0	0	0	0	0	0	0	0	0	0	0	0	0	0	0	0	0	0	0	0	0	0	0	0	0	0	0	0	0	0	0	0
38	2.10.	7965	7	f	infected	feces	feces	20813	20307	2734	0	2152	129	0	96	6	529	18	658	462	231	204	0	0	0	0	0	0	0	0	0	0	0	0	0	0	0	0	0	0	0	0	0	0	0	0	0	0	0
39	2.11.	7370	0	m	infected	feces	feces	1912	1225	298	0	548	45	0	23	6	65	30	0	0	0	0	0	0	0	0	0	0	0	0	0	0	0	0	0	0	0	0	0	0	0	0	0	0	0	0	0	0	0
40	2.12.	7370	4	m	infected	feces	feces	1505	2162	428	0	50	12	0	6	0	12	12	0	0	0	0	0	0	0	0	0	0	0	0	0	0	0	0	0	0	0	0	0	0	0	0	0	0	0	0	0	0	0
41	2.13.	7367	0	m	infected	feces	feces	2398	1046	262	0	138	10	0	5	35	6	31	0	0	0	0	0	0	0	0	0	0	0	0	0	0	0	0	0	0	0	0	0	0	0	0	0	0	0	0	0	0	0
42	2.14.	7367	7	m	infected	feces	feces	1736	824	91	0	169	32	0	30	104	27	26	0	0	0	0	0	0	0	0	0	0	0	0	0	0	0	0	0	0	0	0	0	0	0	0	0	0	0	0	0	0	0
43	2.15.	7367	14	m	infected	feces	feces	1344	1154	133	0	246	0	0	5	142	18	48	0	0	0	0	0	0	0	0	0	0	0	0	0	0	0	0	0	0	0	0	0	0	0	0	0	0	0	0	0	0	0
44	2.16.	7402	0	f	infected	feces	feces	956	1501	122	0	209	11	0	7	325	22	57	0	0	0	0	0	0	0	0	0	0	0	0	0	0	0	0	0	0	0	0	0	0	0	0	0	0	0	0	0	0	0
45	2.17.	7402	2	f	infected	feces	feces	1959	2762	237	0	111	12	0	17	70	18	38	0	0	0	0	0	0	0	0	0	0	5	0	0	0	0	0	0	0	0	0	0	0	0	0	0	0	0	0	0	0	0
46	2.18.	7402	7	f	infected	feces	feces	2737	2519	210	0	127	6	0	6	132	9	48	0	0	0	0	0	0	0	0	0	0	0	0	0	0	0	0	0	0	0	0	0	0	0	0	0	0	0	0	0	0	0
47	2.19.	7402	14	f	infected	feces	feces	864	2035	898	0	0	0	0	0	0	0	89	0	0	0	0	0	0	0	0	0	0	0	0	0	0	0	0	0	0	0	0	0	0	0	0	0	0	0	0	0	0	0
48	2.20.	7480	0	m	infected	feces	feces	1519	733	57	0	181	110	0	33	0	0	20	0	0	0	0	0	0	0	0	0	0	0	0	0	0	0	0	0	0	0	0	0	0	0	0	0	0	0	0	0	0	0
49	2.21.	7480	2	m	infected	feces	feces	933	1747	58	0	79	0	0	4	0	0	0	0	0	0	0	4	0	0	0	0	0	0	0	0	0	0	0	0	0	0	0	0	0	0	0	0	0	0	0	0	0	0
50	2.22.	7480	7	m	infected	feces	feces	2345	1970	340	0	173	11	0	9	0	0	0	0	0	0	0	0	0	0	0	0	0	0	0	0	0	0	0	0	0	0	0	0	0	0	0	0	0	0	0	0	0	0
51	2.23.	7367	21	m	infected	feces	feces	1425	1161	69	0	0	102	0	99	0	0	0	0	0	0	0	0	0	0	0	0	0	0	0	0	0	0	0	0	0	0	0	0	0	0	0	0	0	0	0	0	0	0
52	2.24.	7367	25	m	infected	feces	feces	3468	1979	132	0	0	14	0	6	0	5	0	122	0	0	0	0	0	0	0	0	0	0	0	0	0	0	0	0	0	0	0	0	0	0	0	0	0	0	0	0	0	0
53	3.1.	7402	21	f	infected	feces	feces	1642	697	137	0	0	5	0	7	0	14	0	0	0	0	0	0	0	0	0	0	0	0	0	0	0	0	0	0	0	0	0	0	0	0	0	0	0	0	0	0	0	0
54	3.2.	7402	25	f	infected	feces	feces	520	1254	53	0	0	0	0	9	0	0	0	0	0	0	0	0	0	0	0	0	0	0	0	0	0	0	0	7	0	0	0	0	0	0	0	0	0	0	0	0	0	0
55	3.3.	7480	21	m	infected	feces	feces	5	1077	0	0	0	4	0	0	0	0	0	0	0	0	0	0	0	0	0	0	0	0	0	0	0	0	0	0	0	0	0	0	0	0	0	0	0	0	0	0	0	0
56	3.4.	7480	25	m	infected	feces	feces	6	968	0	0	0	5	0	15	0	0	0	0	0	0	0	0	0	0	0	0	0	0	0	0	0	0	0	0	0	0	0	0	0	0	0	0	0	0	0	0	0	0
57	3.5.	7367	22	m	infected	feces	feces	1178	1343	0	6	0	8	10	83	0	0	0	0	0	0	0	0	0	0	0	0	0	0	0	0	0	0	0	0	0	7	0	0	0	0	0	0	0	0	0	0	0	0
58	3.6.	7367	23	m	infected	feces	feces	3274	2613	278	19	0	0	0	2	0	27	0	0	0	0	0	0	0	0	0	0	0	0	0	0	0	0	0	0	0	0	0	0	0	0	0	0	0	0	0	0	0	0
59	3.7.	7402	22	f	infected	feces	feces	2064	1680	209	0	0	19	0	36	0	49	0	0	0	0	0	0	0	0	0	0	0	0	0	0	0	0	0	0	0	0	0	0	0	0	0	0	0	0	0	0	0	0
60	3.8.	7402	23	f	infected	feces	feces	490	1001	60	0	0	5	0	36	0	15	0	0	0	0	0	0	0	0	0	0	0	0	0	0	0	0	0	0	0	0	0	0	0	0	0	0	0	0	0	0	0	0
61	3.9.	7480	22	m	infected	feces	feces	986	1312	164	0	0	21	0	30	0	0	0	0	0	0	0	0	0	0	0	0	0	0	0	0	0	0	0	0	0	0	0	0	0	0	0	0	0	0	0	0	0	0
62	3.10.	7480	23	m	infected	feces	feces	1550	1721	210	0	0	0	11	0	0	3	0	0	0	0	0	0	0	0	0	0	0	0	0	0	0	0	0	0	0	0	0	0	0	0	0	0	0	0	0	0	0	0
63	3.11.	7367	2	m	infected	feces	feces	1981	70	491	0	0	0	1570	0	11	0	99	0	0	0	0	0	0	0	0	0	0	0	0	0	0	0	0	0	0	0	0	0	0	0	0	0	0	0	0	0	0	0
64	3.12.	7367	4	m	infected	feces	feces	175	16	46	0	0	0	487	0	0	6	0	0	0	0	0	0	0	0	0	0	0	0	0	0	0	0	0	0	0	0	0	0	0	0	0	0	0	0	0	0	0	0
65	3.13.	7402	4	f	infected	feces	feces	798	228	124	0	0	27	884	40	0	97	11	0	0	0	0	0	0	0	0	0	0	0	0	0	0	0	0	0	0	0	0	0	0	0	0	0	0	0	0	0	0	0
66	3.14.	7480	4	m	infected	feces	feces	905	0	162	3	0	24	702	61	0	19	0	0	0	0	0	0	0	0	0	0	0	0	0	0	0	0	0	0	0	0	0	0	0	0	0	0	0	0	0	0	0	0
67	3.15.	7407	0	m	infected	feces	feces	1638	9	126	8	0	12	1251	5	0	14	23	0	0	0	0	0	0	0	0	0	0	0	0	0	0	0	0	0	0	0	0	0	0	0	0	0	0	0	0	0	0	0
68	3.16.	7407	2	m	infected	feces	feces	1351	12	117	11	0	44	970	40	0	48	20	0	0	0	0	0	0	0	0	0	0	0	0	0	0	0	0	0	0	0	0	0	0	0	0	0	0	0	0	0	0	0
69	3.17.	7407	4	m	infected	feces	feces	1346	15	66	15	0	71	884	30	0	48	19	0	0	0	0	0	0	0	0	0	0	0	0	0	0	0	0	0	0	0	0	0	0	0	0	0	0	0	0	0	0	0
70	3.18.	7407	7	m	infected	feces	feces	975	26	86	16	0	48	720	17	0	66	17	0	0	0	0	0	0	0	0	0	0	0	0	0	0	0	0	0	0	0	0	0	0	0	0	0	0	0	0	0	0	0
71	3.19.	7407	14	m	infected	feces	feces	1676	101	592	297	0	168	1270	51	0	105	230	0	0	0	0	0	0	0	0	0	0	0	0	0	0	0	7	0	0	0	0	0	0	0	0	0	0	0	0	0	0	0
72	3.20.	7407	21	m	infected	feces	feces	2931	69	0	0	123	39	0	14	0	28	19	0	0	0	0	0	0	0	0	0	0	0	0	0	0	0	0	0	0	0	0	0	0	0	0	0	0	0	0	0	0	0
73	3.21.	7407	22	m	infected	feces	feces	1695	348	0	0	62	214	0	100	0	0	0	0	0	0	0	0	0	0	0	0	0	0	0	0	0	0	0	0	0	0	0	0	0	0	0	0	0	0	0	0	0	0
74	3.22.	7407	23	m	infected	feces	feces	1208	578	49	0	0	17	0	13	0	0	0	0	0	0	0	0	0	0	0	0	0	0	0	0	0	0	0	0	0	0	0	0	0	0	0	0	0	0	0	0	0	0
75	3.23.	7407	25	m	infected	feces	feces	582	768	73	0	0	96	0	37	0	6	0	0	0	0	0	0	0	0	0	0	0	0	0	0	0	0	0	0	0	0	0	0	0	0	0	0	0	0	0	0	0	0
76	3.24.	7407	31	m	infected	feces	feces	2426	1875	417	0	0	0	0	10	0	0	0	0	0	0	0	0	0	0	0	0	0	0	0	0	0	0	0	0	0	0	0	0	0	0	0	0	0	0	0	0	0	0
77	3.25.	7408	2	m	infected	feces	feces	1263	1039	107	18	0	11	0	26	0	5	0	0	0	0	0	0	0	0	0	0	0	0	0	0	0	0	0	0	0	0	0	0	0	0	0	0	0	0	0	0	0	0
78	3.26.	7408	4	m	infected	feces	feces	807	384	83	12	0	43	0	84	0	31	0	0	0	0	0	0	0	0	0	0	0	0	0	0	0	0	0	0	0	0	0	0	0	0	0	0	0	0	0	0	0	0
79	3.27.	7408	7	m	infected	feces	feces	890	1008	166	16	0	13	24	20	0	15	0	0	0	0	0	0	0	0	0	0	0	0	0	0	0	0	0	0	0	0	0	0	0	0	0	0	0	0	0	0	0	0
80	3.28.	7408	14	m	infected	feces	feces	1638	1563	346	0	0	4	0	3	0	0	0	0	0	0	0	0	0	0	0	0	0	0	0	0	0	0	0	0	0	0	0	0	0	0	0	0	0	0	0	0	0	0
81	3.29.	7408	21	m	infected	feces	feces	650	1280	91	0	0	0	0	3	0	0	0	0	0	0	0	0	0	0	0	0	0	0	0	0	0	0	0	0	0	0	0	0	0	0	0	0	0	0	0	0	0	0
82	3.30.	7408	22	m	infected	feces	feces	7651	1120	1385	0	362	485	15	411	0	15	76	249	0	0	0	0	0	0	0	0	0	0	0	0	0	0	0	0	0	0	0	0	0	0	0	0	0	0	0	0	0	0
83	3.31.	7408	23	m	infected	feces	feces	143	93	0	0	0	20	0	14	0	0	0	0	0	0	0	0	0	0	0	0	0	0	0	0	0	0	0	0	0	0	0	0	0	0	0	0	0	0	0	0	0	0
84	3.32.	7408	25	m	infected	feces	feces	2722	1062	72	0	83	26	0	10	0	0	0	0	0	0	0	0	0	0	0	0	0	3	0	0	0	0	0	0	0	0	0	0	0	0	0	0	0	0	0	0	0	0
85	3.33.	7408	31	m	infected	feces	feces	1681	1099	57	0	65	36	0	14	0	0	0	0	0	0	0	0	0	0	0	0	0	0	0	0	0	0	0	0	7	0	0	0	0	0	0	0	0	0	0	0	0	0
86	3.34.	7995	0	f	infected	feces	feces	1489	717	65	0	0	68	0	50	0	13	0	0	0	0	0	0	0	0	0	0	0	0	0	0	0	0	0	0	0	0	0	0	0	0	0	0	0	0	0	0	0	0
87	3.35.	7995	2	f	infected	feces	feces	2200	2413	723	21	52	4	0	22	0	33	0	0	0	0	0	0	0	0	0	0	0	0	0	0	0	0	0	0	0	0	0	0	0	0	0	0	0	0	0	0	0	0
88	3.36.	7995	4	f	infected	feces	feces	1428	1174	320	5	0	0	10	33	0	18	0	0	0	0	0	0	0	0	0	0	0	0	0	0	0	0	0	0	0	0	0	0	0	0	0	0	0	0	0	0	0	0
89	3.37.	7995	7	f	infected	feces	feces	1453	2017	214	0	0	17	0	44	0	16	0	0	0	0	0	0	0	0	0	0	0	0	0	0	0	0	0	0	0	0	0	0	0	0	0	0	0	0	0	0	0	0
90	3.38.	7995	14	f	infected	feces	feces	1239	1796	135	10	0	11	0	66	0	0	0	0	0	0	0	0	0	0	0	0	0	0	0	0	0	0	0	0	0	0	0	0	0	0	0	0	0	0	0	0	0	0
91	3.39.	7995	21	f	infected	feces	feces	3048	2391	407	28	167	0	0	0	0	0	0	0	0	0	0	0	0	0	0	0	0	0	0	0	0	0	0	0	0	0	0	0	0	0	0	0	0	0	0	0	0	0
92	4.1.	7995	22	f	infected	feces	feces	4401	952	584	0	135	37	0	0	4	11	36	0	0	0	0	0	0	0	0	0	0	0	0	0	0	0	0	0	0	0	0	0	0	0	0	0	0	0	0	0	0	0
93	4.2.	7995	23	f	infected	feces	feces	399	161	57	0	0	21	0	0	0	0	0	0	0	0	0	0	0	0	0	0	0	0	0	0	0	0	0	0	0	0	0	0	0	0	0	0	0	0	0	0	0	0
94	4.3.	7995	25	f	infected	feces	feces	2099	1288	222	0	61	10	0	8	0	0	17	0	0	0	0	0	0	0	0	0	0	0	0	0	0	0	0	0	0	0	0	0	0	0	0	0	0	0	0	0	0	0
95	4.4.	7995	31	f	infected	feces	feces	2548	882	252	0	75	270	0	78	0	50	18	0	0	0	0	0	0	0	0	0	0	0	0	0	0	0	0	0	0	0	0	0	0	0	0	0	0	0	0	0	0	0
96	4.5.	7991	0	f	infected	feces	feces	2617	2023	1473	0	363	81	0	111	124	13	50	0	0	0	0	0	0	0	0	0	0	0	0	0	0	0	0	0	0	0	0	0	0	0	0	0	0	0	0	0	0	0
97	4.6.	7991	2	f	infected	feces	feces	3434	2094	878	0	678	74	0	93	122	54	115	0	0	0	0	0	0	0	0	0	0	0	0	0	0	0	0	0	0	0	0	0	0	0	0	5	0	0	0	0	0	0
98	4.7.	7991	4	f	infected	feces	feces	513	67	0	0	0	620	0	132	0	0	0	0	0	0	0	0	0	0	0	0	0	0	0	0	0	0	0	0	0	0	0	0	0	0	0	0	0	0	0	0	0	0
99	4.8.	7991	7	f	infected	feces	feces	1105	1738	489	0	221	77	0	123	0	74	63	0	0	0	0	0	0	0	0	0	0	0	0	0	0	0	0	0	0	0	0	0	0	0	0	0	0	0	0	0	0	0
100	4.9.	7991	14	f	infected	feces	feces	17	6	0	0	0	306	0	64	0	0	0	0	0	0	0	0	0	0	0	0	0	0	0	0	0	0	0	0	0	0	0	0	0	0	0	0	0	0	0	0	0	0
101	4.10.	7991	21	f	infected	feces	feces	1744	2277	485	0	389	30	0	96	38	20	99	0	0	0	0	0	0	0	0	0	0	0	0	0	0	0	0	0	0	0	0	0	0	0	0	0	0	0	0	0	0	0
102	4.11.	7991	22	f	infected	feces	feces	2701	727	130	0	60	456	0	374	0	0	0	0	0	0	0	0	0	0	0	0	0	0	0	0	0	0	0	0	0	0	0	0	0	0	0	0	0	0	0	0	0	0
103	4.12.	7991	23	f	infected	feces	feces	1081	678	75	0	0	346	0	187	0	0	0	0	0	0	0	0	0	0	0	0	0	0	0	0	0	0	0	0	0	0	0	0	0	0	0	0	0	0	0	0	0	0
104	4.13.	7991	25	f	infected	feces	feces	1118	910	85	0	446	79	0	29	1245	53	218	0	0	0	0	0	0	0	0	0	0	0	0	0	0	0	0	0	0	0	0	0	0	0	0	0	0	0	0	0	0	0
105	4.14.	7991	31	f	infected	feces	feces	337	461	53	0	137	86	0	23	1011	56	97	0	0	0	0	0	9	0	0	0	0	0	0	0	0	0	0	0	0	0	0	0	0	0	0	0	0	0	0	0	0	0
106	4.15.	7403	0	f	infected	feces	feces	281	689	106	0	139	13	0	13	1419	26	99	0	0	0	0	0	0	0	0	0	0	0	0	0	0	0	0	0	0	0	0	0	0	0	0	0	0	0	0	0	0	0
107	4.16.	7403	2	f	infected	feces	feces	1996	771	898	0	372	15	0	0	97	45	0	0	0	0	0	0	0	0	0	0	0	0	0	0	0	0	0	0	0	0	0	0	0	0	0	0	0	0	0	0	0	0
108	4.17.	7403	4	f	infected	feces	feces	0	37	64	0	40	8	0	0	0	10	0	0	0	0	0	0	0	0	0	0	0	0	0	0	0	0	0	0	0	0	0	0	0	0	0	0	0	0	0	0	0	0
109	4.18.	7403	7	f	infected	feces	feces	472	609	392	0	73	92	0	31	76	13	19	0	0	0	0	0	0	0	0	0	0	0	0	0	0	0	0	0	0	0	0	0	0	0	0	0	0	0	0	0	0	0
110	4.19.	7403	14	f	infected	feces	feces	759	1026	301	0	0	0	0	0	0	0	12	0	0	0	0	0	0	0	0	0	0	0	0	0	0	0	0	0	0	0	0	0	0	0	0	0	0	0	0	0	0	0
111	4.20.	7403	21	f	infected	feces	feces	499	1166	306	0	0	0	0	11	0	0	0	0	0	0	0	3	0	0	0	0	0	0	0	0	0	0	0	0	0	0	0	0	0	0	0	0	0	0	0	0	0	0
112	4.21.	7970	0	m	infected	feces	feces	1133	1974	609	0	0	0	0	0	0	0	47	0	0	0	0	0	0	0	0	0	0	0	0	0	0	0	0	0	0	0	0	0	0	0	0	0	0	0	0	0	2	0
113	4.22.	7970	2	m	infected	feces	feces	751	1561	213	0	0	0	0	10	0	0	19	0	0	0	0	0	0	0	0	0	0	0	0	0	0	0	0	0	0	0	0	0	0	0	0	0	0	0	0	0	0	0
114	5.1.	7970	4	m	infected	feces	feces	2790	1124	1928	0	0	146	0	32	16	0	0	0	0	0	0	0	0	0	0	0	0	0	0	0	0	0	0	0	0	0	0	0	0	0	0	0	0	0	0	0	0	0
115	5.2.	7970	7	m	infected	feces	feces	1611	1474	594	0	0	22	0	7	10	0	0	0	0	0	0	0	0	0	0	0	0	0	0	0	0	0	0	0	0	0	0	0	0	0	0	0	0	0	0	0	0	0
116	5.3.	7970	14	m	infected	feces	feces	896	1085	286	0	0	0	0	0	4	0	0	0	0	0	0	0	0	0	0	0	0	0	0	0	0	0	0	0	0	0	0	0	0	0	0	0	0	0	0	0	0	0
117	5.4.	7970	21	m	infected	feces	feces	1312	1794	234	0	0	28	0	29	0	0	0	0	0	0	0	0	0	0	0	0	0	0	8	0	0	0	0	0	0	0	0	0	0	0	0	0	0	0	0	0	0	0
118	5.5.	7478	0	m	infected	feces	feces	1189	2938	377	0	0	14	0	37	0	0	0	0	0	0	0	0	0	0	0	0	0	0	0	0	0	0	0	0	0	0	0	0	0	0	0	0	0	0	0	0	0	0
119	5.6.	7478	2	m	infected	feces	feces	2671	3530	2083	0	0	134	0	51	0	0	0	0	0	0	0	0	0	0	0	0	0	0	0	8	0	0	0	0	0	0	0	0	0	0	0	0	0	0	0	0	0	0
120	5.7.	7478	4	m	infected	feces	feces	1835	2283	1302	0	0	54	0	28	0	0	0	0	0	0	0	0	0	0	0	0	0	0	0	0	0	0	0	0	0	0	0	0	0	0	6	0	0	0	0	0	0	0
121	5.8.	7478	7	m	infected	feces	feces	2476	1796	360	0	0	44	0	25	0	0	0	0	0	0	0	0	0	0	0	0	0	0	0	0	0	0	0	0	0	0	0	0	0	0	0	0	0	0	0	0	0	0
122	5.9.	7478	14	m	infected	feces	feces	4459	3325	754	0	0	124	0	47	0	0	0	0	0	0	0	0	0	0	0	0	0	0	0	0	0	0	0	0	0	0	0	0	0	0	0	0	0	0	0	0	0	0
123	5.10.	7478	21	m	infected	feces	feces	1615	853	95	0	0	455	0	95	0	0	0	0	0	0	0	0	0	0	0	0	0	0	0	0	0	0	0	0	0	0	0	0	0	0	0	0	0	0	0	0	0	0
124	5.11.	7939	0	f	infected	feces	feces	1462	824	85	0	0	156	0	59	0	0	0	0	0	0	0	0	0	0	0	0	0	0	0	0	0	0	0	0	0	0	0	0	0	0	0	0	0	0	0	0	0	0
125	5.12.	7939	2	f	infected	feces	feces	3466	1927	501	0	0	56	0	22	0	0	0	0	0	0	0	0	0	0	0	0	0	0	0	0	0	0	0	0	0	0	0	0	0	0	0	0	0	0	0	0	0	0
126	5.13.	7939	4	f	infected	feces	feces	1516	395	162	0	0	260	0	90	0	25	0	0	0	0	0	0	0	0	0	0	0	0	0	0	0	0	0	0	0	0	0	0	0	0	0	0	0	0	0	0	0	0
127	5.14.	7939	7	f	infected	feces	feces	2583	2327	345	0	0	76	0	84	0	0	0	0	0	0	0	0	0	0	0	0	0	0	0	0	0	0	0	0	0	0	0	0	0	0	0	0	0	0	0	0	0	0
128	5.15.	7939	14	f	infected	feces	feces	3580	3090	1104	0	0	142	0	63	0	6	0	0	0	0	0	0	6	0	0	0	0	0	0	0	0	0	0	0	0	0	0	0	0	0	0	0	0	0	0	0	0	0
129	5.16.	7939	21	f	infected	feces	feces	2961	2425	845	0	0	97	0	42	0	11	0	0	0	0	0	0	0	0	0	0	0	0	0	0	0	0	0	0	0	0	7	0	0	0	0	0	0	0	0	0	0	0
130	5.17.	7477	0	m	infected	feces	feces	1737	3188	2684	0	0	78	0	28	0	0	0	0	0	0	0	0	0	0	0	0	0	0	0	0	0	0	0	0	0	0	0	0	0	0	0	0	0	0	0	0	0	0
131	5.18.	7477	2	m	infected	feces	feces	1434	3355	2437	0	0	62	0	49	0	0	0	0	0	0	0	0	0	0	0	0	0	0	0	0	0	0	0	0	0	0	0	0	0	0	0	0	0	0	0	0	0	0
132	5.19.	7477	4	m	infected	feces	feces	2961	1505	167	0	322	203	0	60	348	87	48	0	0	0	0	0	13	0	0	0	0	0	0	0	0	0	0	0	0	0	0	0	0	0	0	0	0	0	0	0	0	0
133	5.20.	7470	0	f	infected	feces	feces	4322	1551	535	0	967	334	0	39	672	129	83	0	0	0	0	0	13	0	0	0	0	0	0	0	0	0	0	0	0	0	0	0	0	0	0	0	0	0	0	0	0	0
134	5.21.	7470	2	f	infected	feces	feces	1453	1086	274	0	359	132	0	46	386	64	65	0	0	0	0	0	0	0	0	0	0	0	0	0	0	0	0	0	0	0	0	0	0	0	0	0	0	0	0	0	0	0
135	5.22.	7470	4	f	infected	feces	feces	1730	2236	262	0	458	60	0	61	147	29	55	0	0	0	0	0	0	0	0	0	0	0	0	0	0	0	0	0	0	0	0	0	0	0	0	0	0	0	0	0	0	0
136	5.23.	7410	0	m	infected	feces	feces	3591	3990	435	0	140	56	0	23	0	45	57	0	0	0	0	0	0	0	0	0	0	0	0	0	0	0	0	0	0	0	0	0	0	0	0	0	0	0	0	0	0	0
137	5.24.	7410	2	m	infected	feces	feces	2926	3166	362	0	132	21	0	24	0	26	44	0	0	0	0	0	0	0	0	0	0	0	0	0	0	0	0	0	0	0	0	0	0	0	0	0	0	0	0	0	0	0
138	5.25.	7410	4	m	infected	feces	feces	1959	2626	1009	3	125	55	0	23	0	30	28	0	0	0	0	0	0	0	0	0	0	0	0	0	0	0	0	0	0	0	0	0	0	0	0	0	0	0	0	0	0	0
139	5.26.	7410	7	m	infected	feces	feces	1778	2760	1035	0	122	57	0	40	0	32	28	0	0	0	0	0	0	0	0	0	0	0	0	0	0	0	0	0	0	0	0	0	0	0	0	0	0	0	0	0	0	0
140	5.27.	7964	0	f	infected	feces	feces	1861	112	0	0	62	49	0	5	0	5	12	0	0	0	0	0	0	0	0	0	0	0	0	0	0	0	0	0	0	0	0	0	0	0	0	0	0	0	0	0	0	0
141	5.28.	7964	2	f	infected	feces	feces	944	232	0	0	0	90	0	29	0	63	0	0	0	0	0	0	0	0	0	0	0	0	0	0	0	0	0	0	0	0	0	0	0	0	0	0	0	0	0	0	0	0
142	5.29.	7964	4	f	infected	feces	feces	714	546	57	0	0	115	0	37	0	37	7	0	0	0	0	0	0	0	0	0	0	0	0	0	0	0	0	0	0	0	0	0	0	0	0	0	0	0	0	0	0	0
143	5.30.	7993	0	f	infected	feces	feces	2083	314	243	0	0	10	0	0	6	0	63	0	0	0	0	0	0	0	0	0	0	0	0	0	0	0	0	0	0	0	0	0	0	0	0	0	0	0	0	0	0	0
144	5.31.	7993	2	f	infected	feces	feces	73	58	0	0	0	13	0	5	0	0	0	0	0	0	0	0	0	0	0	0	0	0	0	0	0	0	0	0	0	0	0	0	0	0	0	0	0	0	0	0	0	0
145	5.32.	7993	4	f	infected	feces	feces	20	528	0	0	0	5	0	7	0	0	0	0	0	0	0	0	0	0	0	0	0	0	0	0	0	0	0	0	0	0	0	0	0	0	0	0	0	0	0	0	0	0
146	5.33.	7445	0	m	infected	feces	feces	45	970	0	0	0	5	0	17	0	0	0	0	0	0	0	0	0	0	0	0	0	0	0	0	0	0	0	0	0	0	0	0	0	0	0	0	0	0	0	0	0	0
147	5.34.	7445	2	m	infected	feces	feces	52	1233	0	0	0	24	0	30	0	0	0	0	0	0	0	0	0	0	0	0	0	0	0	0	0	0	0	0	0	0	0	0	0	0	0	0	0	0	0	0	0	0
148	5.35.	7445	4	m	infected	feces	feces	515	2919	49	0	0	0	0	9	0	0	22	0	0	0	0	0	0	0	0	0	0	0	0	0	0	0	0	0	0	0	0	0	0	0	0	0	0	0	0	0	0	0
149	5.36.	7443	2	m	infected	feces	feces	1841	2472	361	0	0	0	0	7	0	0	0	0	0	0	0	0	0	0	0	0	0	0	0	0	0	0	0	0	0	0	0	0	0	0	0	0	0	0	0	0	0	0
150	5.37.	7443	4	m	infected	feces	feces	1151	1059	189	0	0	0	0	2	0	0	0	0	0	0	0	0	0	0	0	0	0	0	0	0	0	0	0	0	0	0	0	0	0	0	0	0	0	0	0	0	0	0
151	5.38.	7443	7	m	infected	feces	feces	730	1171	130	0	0	24	0	15	0	0	0	0	0	0	0	0	0	0	0	0	0	0	0	0	0	0	0	0	0	0	0	0	0	0	0	0	0	0	0	0	0	0
152	5.39.	7443	14	m	infected	feces	feces	1106	2950	264	0	0	0	0	20	0	0	0	0	0	0	0	0	0	0	0	0	0	0	0	0	0	0	0	0	0	0	0	0	0	0	0	0	0	0	0	0	0	0
153	5.40.	7443	21	m	infected	feces	feces	1326	2594	375	0	0	0	0	4	0	0	0	0	0	0	0	0	0	0	0	0	0	0	0	0	0	0	0	0	0	0	0	0	0	0	0	0	0	0	0	0	0	0
154	5.41.	7443	22	m	infected	feces	feces	776	2469	231	0	0	10	0	55	0	0	0	0	0	0	0	0	0	0	0	0	0	0	0	0	0	0	0	0	0	0	0	0	0	0	0	0	0	0	0	0	0	0
155	5.42.	7443	23	m	infected	feces	feces	523	2097	153	0	0	0	0	53	0	0	0	0	0	0	0	16	0	0	0	0	0	0	0	0	0	0	0	0	0	0	0	0	0	0	0	0	0	0	0	0	0	0
156	5.43.	7443	25	m	infected	feces	feces	774	2305	198	0	0	15	0	80	0	0	0	0	0	0	0	0	0	0	0	0	0	0	0	0	0	0	0	0	0	0	0	0	0	0	0	0	0	0	0	0	0	0
157	6.1.	7936	30	f	healthy	intestinal_sample	colon_distal	13	7116	0	3648	0	3	0	111	0	0	0	0	0	0	0	0	0	0	0	0	0	0	0	0	0	0	0	0	0	0	0	0	0	0	0	0	0	0	0	0	0	0
158	6.2.	7936	30	f	healthy	intestinal_sample	colon_proximal	0	3369	0	1012	0	0	0	144	0	0	0	0	0	0	0	0	0	0	0	0	0	0	0	0	0	0	0	0	0	0	0	0	0	0	0	0	0	0	0	0	0	0
159	6.3.	7936	30	f	healthy	intestinal_sample	ileum	138	341	0	23	0	0	0	0	0	0	0	0	0	0	0	0	0	0	0	0	0	0	0	0	0	0	0	0	0	0	0	0	0	0	0	0	0	0	0	0	0	0
160	6.4.	7444	30	m	healthy	intestinal_sample	colon_distal	7427	6752	712	108	0	11	0	119	0	6	0	0	0	0	0	0	0	0	0	0	0	0	0	0	0	0	0	0	0	0	0	0	0	0	0	0	0	5	0	0	0	0
161	6.5.	7444	30	m	healthy	intestinal_sample	colon_proximal	3468	3769	318	44	0	11	0	151	0	11	0	0	0	0	0	0	0	0	0	0	0	0	0	0	0	0	0	0	0	0	0	0	0	0	0	0	0	0	0	0	0	0
162	6.6.	7444	30	m	healthy	intestinal_sample	ileum	58	69	0	0	0	0	0	0	0	0	0	0	0	0	0	0	0	0	0	0	0	0	0	0	0	0	0	0	0	0	0	0	0	0	0	0	0	0	0	0	0	0
163	6.7.	7460	30	m	healthy	intestinal_sample	colon_distal	2154	3024	323	152	0	26	0	63	0	33	0	0	0	0	0	0	0	0	0	0	0	0	0	0	0	0	0	0	0	0	0	0	0	0	0	0	0	0	0	0	0	0
164	6.8.	7460	30	m	healthy	intestinal_sample	colon_proximal	2311	3063	352	177	0	5	0	27	0	12	10	0	0	0	0	0	0	0	0	0	0	0	0	0	0	0	0	0	0	0	0	0	0	0	0	0	0	0	0	0	0	0
165	6.9.	7460	30	m	healthy	intestinal_sample	ileum	12	27	0	14	0	0	0	0	0	0	0	0	0	0	0	0	0	0	0	0	0	0	0	0	0	0	0	0	0	0	0	0	0	0	0	0	0	0	0	0	0	0
166	6.10.	7370	7	m	infected	intestinal_sample	colon_distal	2025	1607	215	0	0	225	0	96	0	51	14	0	0	0	0	0	0	0	0	0	0	0	0	0	0	0	0	0	0	0	0	7	0	0	0	0	0	0	0	0	0	0
167	6.11.	7370	7	m	infected	intestinal_sample	colon_proximal	742	626	88	0	0	466	0	101	0	34	0	0	0	0	0	0	0	0	0	0	0	0	0	0	0	0	0	0	0	0	0	0	0	0	0	0	0	0	0	0	0	0
168	6.12.	7367	25	m	infected	intestinal_sample	colon_distal	3886	3347	639	0	0	195	0	38	0	0	0	0	0	0	0	0	0	0	0	0	0	0	0	0	0	0	0	0	0	0	0	0	0	0	0	0	0	0	0	0	0	0
169	6.13.	7367	25	m	infected	intestinal_sample	colon_proximal	2573	1962	398	0	0	138	0	29	0	0	0	0	0	0	0	0	0	0	0	0	0	0	0	0	0	0	0	0	0	0	0	0	0	0	0	0	0	0	0	0	0	0
170	6.14.	7367	25	m	infected	intestinal_sample	ileum	370	415	85	0	0	45	0	0	0	0	0	0	0	0	0	0	0	0	0	0	0	0	0	0	0	0	0	0	0	0	0	0	0	0	0	0	5	0	0	0	0	0
171	6.15.	7402	25	f	infected	intestinal_sample	colon_distal	2146	3972	3544	0	0	117	0	60	0	0	0	0	0	0	0	0	0	0	0	0	0	0	0	0	0	0	0	0	0	0	0	0	0	0	0	0	0	0	0	0	0	0
172	6.16.	7402	25	f	infected	intestinal_sample	colon_proximal	1444	2480	2118	0	0	67	0	22	0	0	0	0	0	0	0	0	0	0	0	0	0	0	0	0	0	0	0	0	0	0	0	0	0	0	0	0	0	0	0	0	0	0
173	6.17.	7402	25	f	infected	intestinal_sample	ileum	127	283	104	0	0	3	0	0	0	0	0	0	0	0	0	0	0	0	0	0	0	0	0	0	0	0	0	0	0	0	0	0	0	0	0	0	0	0	0	0	0	0
[truncated: 65 more columns]

## Sheet: archaeal_phylotypes
	treatment	day	ASV_1	ASV_2	ASV_3	ASV_4	ASV_5	ASV_6	ASV_7	ASV_8	ASV_9	ASV_10	ASV_11	ASV_12
1	healthy	0	28267.3	21552.6	1608.15	6759.44	0	168.94	0	129.253	27.6675	156.985	545.738	0
2	healthy	2	56730.5	23063.5	4246.95	0	0	116.321	0	105.692	133.011	208.707	754.004	0
3	healthy	4	23587	27086.4	2606.84	432.011	0	110.734	0	217.664	25.4608	67.8956	919.641	0
4	healthy	7	18239.8	26670.4	1273.29	7721.05	0	452.775	0	753.326	0	442.763	125.195	0
5	healthy	14	6718.49	28243.5	2356.65	12036.4	0	215.144	0	706.313	0	860.649	84.6196	0
6	healthy	21	19427.8	26452.1	4596.75	13399.5	0	23.4964	0	62.9443	0	267.571	107.231	0
7	healthy	22	13829.8	20647.6	2387.02	8599.31	0	166.161	0	527.135	0	599.487	93.2327	0
8	healthy	23	16235.1	23167.6	1836.25	7090.78	0	280.062	0	518.967	0	863.978	0	0
9	healthy	25	22143.7	19813	2315.47	7322.64	0	440.56	0	886.238	0	1530.91	48.5538	0
10	healthy	30	34738.7	34362.5	3600.3	10730.2	0	0	0	32.6028	0	10.2708	0	0
11	infected	0	23751.7	6656.21	3772.69	0	870.027	1365.49	6.77606	476.48	454.74	215.223	141.297	112.483
12	infected	2	19024.8	11483.6	2888.91	0	1039.22	1050.4	2753.88	419.777	679.637	124.171	253.546	0
13	infected	4	17499.2	12453.1	2178.27	0	583.635	307.788	1270.72	129.363	492.567	96.579	82.1878	0
14	infected	7	12643.7	13912.5	1539.3	0	768.545	744.488	1353.7	439.031	208.71	228.814	94.9333	0
15	infected	14	16752.1	18434.1	2535.91	15.3595	0	299.378	1696.34	554.456	0	67.1878	0	0
16	infected	21	25878	24891.4	6165.4	107.015	225.918	380.103	2378.36	238.164	0	176.798	104.756	0
17	infected	22	19656.2	18303.1	4502.39	50.6123	136.927	365.446	1624.15	524.768	0	288.28	78.5848	0
18	infected	23	14393.9	17525.7	4844.1	57.4885	120.319	363.735	1672.35	379.181	0	185.038	62.0281	0
19	infected	25	19255.3	22809.4	6420.64	60.3673	149.561	477.227	1941.96	501.325	0	217.242	80.1773	0
20	infected	31	22452.2	19975.5	3840.84	751.342	564.082	371.504	2849.42	125.099	0	243.379	508.607	0
