# Supplementary material for: Archaeome structure and function of the intestinal tract in healthy and H1N1 infected swine
Source: Front Microbiol. 2023 Sep 13;14:1250140. doi: 10.3389/fmicb.2023.1250140 (PMC10534045; doi:10.3389/fmicb.2023.1250140)
Supplement: Supplementary file 3 [file Table_3.xlsx]

## Sheet: Methanobacteriaceae
			C1 Carrier = 1
			Energy conservation = 2
			methyl-CoM reductase = 3
			heterodisulfid reductase = 4
			other enzymes = 5
	counts	in %	Group
ko00680 Methane metabolism	5835
K00018 glycerate dehydrogenase [EC:1.1.1.29]	1	100	5
K00024 malate dehydrogenase [EC:1.1.1.37]	12	1200	5
K00058 D-3-phosphoglycerate dehydrogenase / 2-oxoglutarate reductase [EC:1.1.1.95 1.1.1.399]	17	1700	5
K00125 formate dehydrogenase (coenzyme F420) beta subunit [EC:1.17.98.3 1.8.98.6]	342	34200	2
K00169 pyruvate ferredoxin oxidoreductase alpha subunit [EC:1.2.7.1]	26	2600	4
K00170 pyruvate ferredoxin oxidoreductase beta subunit [EC:1.2.7.1]	16	1600	4
K00171 pyruvate ferredoxin oxidoreductase delta subunit [EC:1.2.7.1]	1	100	4
K00172 pyruvate ferredoxin oxidoreductase gamma subunit [EC:1.2.7.1]	6	600	4
K00196 anaerobic carbon-monoxide dehydrogenase iron sulfur subunit	20	2000	1
K00200 formylmethanofuran dehydrogenase subunit A [EC:1.2.7.12]	140	14000	1
K00201 formylmethanofuran dehydrogenase subunit B [EC:1.2.7.12]	94	9400	1
K00202 formylmethanofuran dehydrogenase subunit C [EC:1.2.7.12]	15	1500	1
K00203 formylmethanofuran dehydrogenase subunit D [EC:1.2.7.12]	31	3100	1
K00204 4Fe-4S ferredoxin	19	1900	4
K00205 4Fe-4S ferredoxin	59	5900	4
K00319 methylenetetrahydromethanopterin dehydrogenase [EC:1.5.98.1]	180	18000	1
K00320 5,10-methylenetetrahydromethanopterin reductase [EC:1.5.98.2]	455	45500	1
K00399 methyl-coenzyme M reductase alpha subunit [EC:2.8.4.1]	328	32800	3
K00400 methyl coenzyme M reductase system, component A2	22	2200	3
K00401 methyl-coenzyme M reductase beta subunit [EC:2.8.4.1]	447	44700	3
K00402 methyl-coenzyme M reductase gamma subunit [EC:2.8.4.1]	228	22800	3
K00440 coenzyme F420 hydrogenase subunit alpha [EC:1.12.98.1]	85	8500	2
K00441 coenzyme F420 hydrogenase subunit beta [EC:1.12.98.1]	68	6800	2
K00442 coenzyme F420 hydrogenase subunit delta	21	2100	2
K00443 coenzyme F420 hydrogenase subunit gamma [EC:1.12.98.1]	65	6500	2
K00577 tetrahydromethanopterin S-methyltransferase subunit A [EC:2.1.1.86]	84	8400	1
K00578 tetrahydromethanopterin S-methyltransferase subunit B [EC:2.1.1.86]	44	4400	1
K00579 tetrahydromethanopterin S-methyltransferase subunit C [EC:2.1.1.86]	107	10700	1
K00580 tetrahydromethanopterin S-methyltransferase subunit D [EC:2.1.1.86]	106	10600	1
K00581 tetrahydromethanopterin S-methyltransferase subunit E [EC:2.1.1.86]	151	15100	1
K00582 tetrahydromethanopterin S-methyltransferase subunit F [EC:2.1.1.86]	28	2800	1
K00583 tetrahydromethanopterin S-methyltransferase subunit G [EC:2.1.1.86]	22	2200	1
K00584 tetrahydromethanopterin S-methyltransferase subunit H [EC:2.1.1.86]	148	14800	1
K00600 glycine hydroxymethyltransferase [EC:2.1.2.1]	4	400	1
K00672 formylmethanofuran--tetrahydromethanopterin N-formyltransferase [EC:2.3.1.101]	22	2200	1
K01007 pyruvate, water dikinase [EC:2.7.9.2]	23	2300	5
K01079 phosphoserine phosphatase [EC:3.1.3.3]	12	1200	5
K01499 methenyltetrahydromethanopterin cyclohydrolase [EC:3.5.4.27]	16	1600	1
K01622 fructose 1,6-bisphosphate aldolase/phosphatase [EC:4.1.2.13 3.1.3.11]	43	4300	5
K01689 enolase [EC:4.2.1.11]	7	700	5
K01895 acetyl-CoA synthetase [EC:6.2.1.1]	5	500	5
K03388 heterodisulfide reductase subunit A2 [EC:1.8.7.3 1.8.98.4 1.8.98.5 1.8.98.6]	337	33700	4
K03389 heterodisulfide reductase subunit B2 [EC:1.8.7.3 1.8.98.4 1.8.98.5 1.8.98.6]	103	10300	4
K03390 heterodisulfide reductase subunit C2 [EC:1.8.7.3 1.8.98.4 1.8.98.5 1.8.98.6]	65	6500	4
K03421 methyl-coenzyme M reductase subunit C	166	16600	3
K03422 methyl-coenzyme M reductase subunit D	104	10400	3
K04480 methanol---5-hydroxybenzimidazolylcobamide Co-methyltransferase [EC:2.1.1.90]	228	22800	1
K05884 L-2-hydroxycarboxylate dehydrogenase (NAD+) [EC:1.1.1.337]	4	400	2
K05979 2-phosphosulfolactate phosphatase [EC:3.1.3.71]	1	100	5
K06034 sulfopyruvate decarboxylase subunit alpha [EC:4.1.1.79]	1	100	1
K06914 tyramine---L-glutamate ligase [EC:6.3.4.24]	1	100	5
K07072 (4-(4-[2-(gamma-L-glutamylamino)ethyl]phenoxymethyl)furan-2-yl)methanamine synthase [EC:2.5.1.131]	1	100	1
K07144 5-(aminomethyl)-3-furanmethanol phosphate kinase [EC:2.7.4.31]	6	600	1
K08094 6-phospho-3-hexuloisomerase [EC:5.3.1.27]	2	200	5
K09733 (5-formylfuran-3-yl)methyl phosphate synthase [EC:4.2.3.153]	6	600	1
K10977 methanogen homocitrate synthase [EC:2.3.3.14 2.3.3.-]	4	400	5
K11212 LPPG:FO 2-phospho-L-lactate transferase [EC:2.7.8.28]	1	100	5
K11260 4Fe-4S ferredoxin	17	1700	4
K11780 7,8-didemethyl-8-hydroxy-5-deazariboflavin synthase [EC:4.3.1.32]	5	500	2
K11781 5-amino-6-(D-ribitylamino)uracil---L-tyrosine 4-hydroxyphenyl transferase [EC:2.5.1.147]	5	500	2
K12234 coenzyme F420-0:L-glutamate ligase / coenzyme F420-1:gamma-L-glutamate ligase [EC:6.3.2.31 6.3.2.34]	7	700	2
K13039 sulfopyruvate decarboxylase subunit beta [EC:4.1.1.79]	3	300	1
K13812 bifunctional enzyme Fae/Hps [EC:4.2.1.147 4.1.2.43]	25	2500	5
K13942 5,10-methenyltetrahydromethanopterin hydrogenase [EC:1.12.98.2]	98	9800	1
K14080 [methyl-Co(III) methanol-specific corrinoid protein]:coenzyme M methyltransferase [EC:2.1.1.246]	56	5600	1
K14081 methanol corrinoid protein	209	20900	1
K14126 F420-non-reducing hydrogenase large subunit [EC:1.12.99.- 1.8.98.5]	243	24300	2
K14127 F420-non-reducing hydrogenase iron-sulfur subunit [EC:1.12.99.- 1.8.98.5 1.8.98.6]	62	6200	2
K14128 F420-non-reducing hydrogenase small subunit [EC:1.12.99.- 1.8.98.5]	129	12900	2
K14941 2-phospho-L-lactate/phosphoenolpyruvate guanylyltransferase [EC:2.7.7.68 2.7.7.105]	1	100	5
K15635 2,3-bisphosphoglycerate-independent phosphoglycerate mutase [EC:5.4.2.12]	11	1100	5
K16306 fructose-bisphosphate aldolase / 2-amino-3,7-dideoxy-D-threo-hept-6-ulosonate synthase [EC:4.1.2.13 2.2.1.10]	7	700	5
K16792 methanogen homoaconitase large subunit [EC:4.2.1.114]	3	300	5
K16793 methanogen homoaconitase small subunit [EC:4.2.1.114]	3	300	5
K18933 tyrosine decarboxylase / aspartate 1-decarboxylase [EC:4.1.1.25 4.1.1.11]	2	200	5
K22480 heterodisulfide reductase subunit A1 [EC:1.8.7.3]	5	500	4
K22481 heterodisulfide reductase subunit B1 [EC:1.8.7.3]	2	200	4
K22516 formate dehydrogenase (coenzyme F420) alpha subunit [EC:1.17.98.3 1.8.98.6]	392	39200	2

## Sheet: Methanobrevibacter
			C1 Carrier = 1
			Energy conservation = 2
			methyl-CoM reductase = 3
			heterodisulfid reductase = 4
			other enzymes = 5
	counts	in %	group
ko00680 Methane metabolism	4994
K00018 glycerate dehydrogenase [EC:1.1.1.29]	1	0.020024	5
K00024 malate dehydrogenase [EC:1.1.1.37]	11	0.220264	5
K00058 D-3-phosphoglycerate dehydrogenase / 2-oxoglutarate reductase [EC:1.1.1.95 1.1.1.399]	16	0.320384	5
K00125 formate dehydrogenase (coenzyme F420) beta subunit [EC:1.17.98.3 1.8.98.6]	339	6.78815	2
K00169 pyruvate ferredoxin oxidoreductase alpha subunit [EC:1.2.7.1]	20	0.400481	4
K00170 pyruvate ferredoxin oxidoreductase beta subunit [EC:1.2.7.1]	13	0.260312	4
K00171 pyruvate ferredoxin oxidoreductase delta subunit [EC:1.2.7.1]	1	0.020024	4
K00172 pyruvate ferredoxin oxidoreductase gamma subunit [EC:1.2.7.1]	6	0.120144	4
K00196 anaerobic carbon-monoxide dehydrogenase iron sulfur subunit	20	0.400481	1
K00200 formylmethanofuran dehydrogenase subunit A [EC:1.2.7.12]	140	2.80336	1
K00201 formylmethanofuran dehydrogenase subunit B [EC:1.2.7.12]	91	1.82219	1
K00202 formylmethanofuran dehydrogenase subunit C [EC:1.2.7.12]	14	0.280336	1
K00203 formylmethanofuran dehydrogenase subunit D [EC:1.2.7.12]	31	0.620745	1
K00204 4Fe-4S ferredoxin	19	0.380457	4
K00205 4Fe-4S ferredoxin	58	1.16139	4
K00319 methylenetetrahydromethanopterin dehydrogenase [EC:1.5.98.1]	180	3.60433	1
K00320 5,10-methylenetetrahydromethanopterin reductase [EC:1.5.98.2]	450	9.01081	1
K00399 methyl-coenzyme M reductase alpha subunit [EC:2.8.4.1]	263	5.26632	3
K00400 methyl coenzyme M reductase system, component A2	18	0.360433	3
K00401 methyl-coenzyme M reductase beta subunit [EC:2.8.4.1]	413	8.26992	3
K00402 methyl-coenzyme M reductase gamma subunit [EC:2.8.4.1]	212	4.24509	3
K00440 coenzyme F420 hydrogenase subunit alpha [EC:1.12.98.1]	72	1.44173	2
K00441 coenzyme F420 hydrogenase subunit beta [EC:1.12.98.1]	68	1.36163	2
K00442 coenzyme F420 hydrogenase subunit delta	21	0.420505	2
K00443 coenzyme F420 hydrogenase subunit gamma [EC:1.12.98.1]	63	1.26151	2
K00577 tetrahydromethanopterin S-methyltransferase subunit A [EC:2.1.1.86]	84	1.68202	1
K00578 tetrahydromethanopterin S-methyltransferase subunit B [EC:2.1.1.86]	44	0.881057	1
K00579 tetrahydromethanopterin S-methyltransferase subunit C [EC:2.1.1.86]	106	2.12255	1
K00580 tetrahydromethanopterin S-methyltransferase subunit D [EC:2.1.1.86]	105	2.10252	1
K00581 tetrahydromethanopterin S-methyltransferase subunit E [EC:2.1.1.86]	150	3.0036	1
K00582 tetrahydromethanopterin S-methyltransferase subunit F [EC:2.1.1.86]	28	0.560673	1
K00583 tetrahydromethanopterin S-methyltransferase subunit G [EC:2.1.1.86]	22	0.440529	1
K00584 tetrahydromethanopterin S-methyltransferase subunit H [EC:2.1.1.86]	147	2.94353	1
K00600 glycine hydroxymethyltransferase [EC:2.1.2.1]	4	0.0800961	1
K00672 formylmethanofuran--tetrahydromethanopterin N-formyltransferase [EC:2.3.1.101]	22	0.440529	1
K01007 pyruvate, water dikinase [EC:2.7.9.2]	22	0.440529	5
K01079 phosphoserine phosphatase [EC:3.1.3.3]	12	0.240288	5
K01499 methenyltetrahydromethanopterin cyclohydrolase [EC:3.5.4.27]	11	0.220264	1
K01622 fructose 1,6-bisphosphate aldolase/phosphatase [EC:4.1.2.13 3.1.3.11]	42	0.841009	5
K01689 enolase [EC:4.2.1.11]	6	0.120144	5
K01895 acetyl-CoA synthetase [EC:6.2.1.1]	5	0.10012	5
K03388 heterodisulfide reductase subunit A2 [EC:1.8.7.3 1.8.98.4 1.8.98.5 1.8.98.6]	278	5.56668	4
K03389 heterodisulfide reductase subunit B2 [EC:1.8.7.3 1.8.98.4 1.8.98.5 1.8.98.6]	84	1.68202	4
K03390 heterodisulfide reductase subunit C2 [EC:1.8.7.3 1.8.98.4 1.8.98.5 1.8.98.6]	54	1.0813	4
K03421 methyl-coenzyme M reductase subunit C	166	3.32399	3
K03422 methyl-coenzyme M reductase subunit D	95	1.90228	3
K05884 L-2-hydroxycarboxylate dehydrogenase (NAD+) [EC:1.1.1.337]	4	0.0800961	2
K05979 2-phosphosulfolactate phosphatase [EC:3.1.3.71]	1	0.020024	5
K06034 sulfopyruvate decarboxylase subunit alpha [EC:4.1.1.79]	1	0.020024	(1)
K06914 tyramine---L-glutamate ligase [EC:6.3.4.24]	1	0.020024	5
K07072 (4-(4-[2-(gamma-L-glutamylamino)ethyl]phenoxymethyl)furan-2-yl)methanamine synthase [EC:2.5.1.131]	1	0.020024	1
K07144 5-(aminomethyl)-3-furanmethanol phosphate kinase [EC:2.7.4.31]	6	0.120144	1
K08094 6-phospho-3-hexuloisomerase [EC:5.3.1.27]	2	0.0400481	5
K09733 (5-formylfuran-3-yl)methyl phosphate synthase [EC:4.2.3.153]	5	0.10012	1
K10977 methanogen homocitrate synthase [EC:2.3.3.14 2.3.3.-]	4	0.0800961	5
K11212 LPPG:FO 2-phospho-L-lactate transferase [EC:2.7.8.28]	1	0.020024	5
K11260 4Fe-4S ferredoxin	13	0.260312	4
K11780 7,8-didemethyl-8-hydroxy-5-deazariboflavin synthase [EC:4.3.1.32]	5	0.10012	2
K11781 5-amino-6-(D-ribitylamino)uracil---L-tyrosine 4-hydroxyphenyl transferase [EC:2.5.1.147]	4	0.0800961	2
K12234 coenzyme F420-0:L-glutamate ligase / coenzyme F420-1:gamma-L-glutamate ligase [EC:6.3.2.31 6.3.2.34]	7	0.140168	2
K13039 sulfopyruvate decarboxylase subunit beta [EC:4.1.1.79]	3	0.0600721	1
K13812 bifunctional enzyme Fae/Hps [EC:4.2.1.147 4.1.2.43]	24	0.480577	5
K13942 5,10-methenyltetrahydromethanopterin hydrogenase [EC:1.12.98.2]	98	1.96235	1
K14126 F420-non-reducing hydrogenase large subunit [EC:1.12.99.- 1.8.98.5]	206	4.12495	2
K14127 F420-non-reducing hydrogenase iron-sulfur subunit [EC:1.12.99.- 1.8.98.5 1.8.98.6]	45	0.901081	2
K14128 F420-non-reducing hydrogenase small subunit [EC:1.12.99.- 1.8.98.5]	114	2.28274	2
K14941 2-phospho-L-lactate/phosphoenolpyruvate guanylyltransferase [EC:2.7.7.68 2.7.7.105]	1	0.020024	5
K15635 2,3-bisphosphoglycerate-independent phosphoglycerate mutase [EC:5.4.2.12]	8	0.160192	5
K16306 fructose-bisphosphate aldolase / 2-amino-3,7-dideoxy-D-threo-hept-6-ulosonate synthase [EC:4.1.2.13 2.2.1.10]	7	0.140168	5
K16792 methanogen homoaconitase large subunit [EC:4.2.1.114]	3	0.0600721	5
K16793 methanogen homoaconitase small subunit [EC:4.2.1.114]	3	0.0600721	5
K18933 tyrosine decarboxylase / aspartate 1-decarboxylase [EC:4.1.1.25 4.1.1.11]	2	0.0400481	5
K22480 heterodisulfide reductase subunit A1 [EC:1.8.7.3]	5	0.10012	4
K22481 heterodisulfide reductase subunit B1 [EC:1.8.7.3]	1	0.020024	4
K22516 formate dehydrogenase (coenzyme F420) alpha subunit [EC:1.17.98.3 1.8.98.6]	392	7.84942	2

## Sheet: Methanosphaera
			C1 Carrier = 1
			Energy conservation = 2
			methyl-CoM reductase = 3
			heterodisulfid reductase = 4
			other enzymes = 5
	counts	in %	Group
ko00680 Methane metabolism	736	100
K00024 malate dehydrogenase [EC:1.1.1.37]	1	0.13587	5
K00169 pyruvate ferredoxin oxidoreductase alpha subunit [EC:1.2.7.1]	5	0.679348	4
K00201 formylmethanofuran dehydrogenase subunit B [EC:1.2.7.12]	1	0.13587	1
K00320 5,10-methylenetetrahydromethanopterin reductase [EC:1.5.98.2]	1	0.13587	1
K00399 methyl-coenzyme M reductase alpha subunit [EC:2.8.4.1]	37	5.02717	3
K00400 methyl coenzyme M reductase system, component A2	4	0.543478	3
K00401 methyl-coenzyme M reductase beta subunit [EC:2.8.4.1]	31	4.21196	3
K00402 methyl-coenzyme M reductase gamma subunit [EC:2.8.4.1]	14	1.90217	3
K00440 coenzyme F420 hydrogenase subunit alpha [EC:1.12.98.1]	1	0.13587	2
K00443 coenzyme F420 hydrogenase subunit gamma [EC:1.12.98.1]	2	0.271739	2
K01007 pyruvate, water dikinase [EC:2.7.9.2]	1	0.13587	5
K01499 methenyltetrahydromethanopterin cyclohydrolase [EC:3.5.4.27]	1	0.13587	1
K01622 fructose 1,6-bisphosphate aldolase/phosphatase [EC:4.1.2.13 3.1.3.11]	1	0.13587	5
K01689 enolase [EC:4.2.1.11]	1	0.13587	5
K03388 heterodisulfide reductase subunit A2 [EC:1.8.7.3 1.8.98.4 1.8.98.5 1.8.98.6]	59	8.0163	4
K03389 heterodisulfide reductase subunit B2 [EC:1.8.7.3 1.8.98.4 1.8.98.5 1.8.98.6]	13	1.7663	4
K03390 heterodisulfide reductase subunit C2 [EC:1.8.7.3 1.8.98.4 1.8.98.5 1.8.98.6]	11	1.49457	4
K03422 methyl-coenzyme M reductase subunit D	9	1.22283	3
K04480 methanol---5-hydroxybenzimidazolylcobamide Co-methyltransferase [EC:2.1.1.90]	228	30.9783	1
K09733 (5-formylfuran-3-yl)methyl phosphate synthase [EC:4.2.3.153]	1	0.13587
K11781 5-amino-6-(D-ribitylamino)uracil---L-tyrosine 4-hydroxyphenyl transferase [EC:2.5.1.147]	1	0.13587	2
K13812 bifunctional enzyme Fae/Hps [EC:4.2.1.147 4.1.2.43]	1	0.13587	5
K14080 [methyl-Co(III) methanol-specific corrinoid protein]:coenzyme M methyltransferase [EC:2.1.1.246]	56	7.6087	1
K14081 methanol corrinoid protein	209	28.3967	1
K14126 F420-non-reducing hydrogenase large subunit [EC:1.12.99.- 1.8.98.5]	25	3.39674	2
K14127 F420-non-reducing hydrogenase iron-sulfur subunit [EC:1.12.99.- 1.8.98.5 1.8.98.6]	7	0.951087	2
K14128 F420-non-reducing hydrogenase small subunit [EC:1.12.99.- 1.8.98.5]	11	1.49457	2
K15635 2,3-bisphosphoglycerate-independent phosphoglycerate mutase [EC:5.4.2.12]	3	0.407609	5
K22481 heterodisulfide reductase subunit B1 [EC:1.8.7.3]	1	0.13587	4
