# Supplementary material for: Archaeome structure and function of the intestinal tract in healthy and H1N1 infected swine
Source: Front Microbiol. 2023 Sep 13;14:1250140. doi: 10.3389/fmicb.2023.1250140 (PMC10534045; doi:10.3389/fmicb.2023.1250140)
Supplement: Supplementary file 4 [file Table_4.xlsx]

## Sheet: archaeal_proteome_eggnog
status		healthy	healthy	healthy	healthy	healthy	healthy	healthy	healthy	healthy	healthy	healthy	healthy	healthy	healthy	healthy	healthy	healthy	mean healthy	sd healthy		infected	infected	infected	infected	infected	infected	infected	infected	infected	infected	infected	infected	infected	infected	infected	mean infected	sd control		mean healthy + infected
earmark		7444	7444	7444	7444	7444	7460	7460	7460	7460	7460	7460	7936	7936	7936	7936	7936	7936				7367	7367	7367	7367	7367	7402	7402	7402	7402	7402	7480	7480	7480	7480	7480
sex		m	m	m	m	m	m	m	m	m	m	m	f	f	f	f	f	f				m	m	m	m	m	f	f	f	f	f	m	m	m	m	m
day		d00	d07	d21	d25	d30	d00	d04	d07	d21	d25	d30	d00	d04	d07	d21	d25	d30				d00	d04	d07	d21	d25	d00	d04	d07	d21	d25	d00	d04	d07	d21	d25
main role	cellular processes and signaling	0.0487691	0.111778	0.116606	0.0487509	0.0871553	0.0855315	0.0902824	0.173675	0.110593	0.0292556	0.114334	0.0846165	0.0783351	0.0915638	0.115735	0.0843256	0.0767414	0.0882718	0.0319355		0.0619664	0.0710613	0.0767518	0.117509	0.0547421	0.0738409	0.0609676	0.0802945	0.0931356	0.0416753	0.0885414	0.0614855	0.0541656	0.09868	0.0523223	0.0726008	0.0197504		0.0811757
	information storage and processing	0.256747	0.0614031	0.0559587	0.139663	0.158654	0.211497	0.0627356	0.126913	0.0998199	0.0976443	0.052556	0.220102	0.076833	0.0833471	0.11093	0.113334	0.136545	0.128264	0.0588426		0.155917	0.111516	0.113933	0.0795976	0.0951806	0.203166	0.115882	0.146839	0.064152	0.0619704	0.0955786	0.137605	0.125185	0.0430755	0.0811712	0.105142	0.0401966		0.117794
	metabolism	0.574933	0.57986	0.704252	0.656521	0.585743	0.560759	0.646162	0.456253	0.674465	0.700847	0.669376	0.574037	0.71706	0.662874	0.606972	0.616503	0.658505	0.629895	0.064435		0.507118	0.692481	0.587508	0.570323	0.689784	0.485727	0.683668	0.490449	0.696717	0.731136	0.573358	0.653285	0.548252	0.624119	0.705153	0.624083	0.0812174		0.627263
	poorly characterized	0.0657745	0.22792	0.100208	0.155066	0.142962	0.107221	0.16439	0.230818	0.115122	0.157956	0.133504	0.0721038	0.0944634	0.123624	0.142047	0.166931	0.0992611	0.127915	0.0453209		0.171129	0.119786	0.156654	0.186849	0.14313	0.138695	0.124281	0.168677	0.132895	0.165219	0.150324	0.132458	0.225732	0.177375	0.144135	0.154938	0.0268197		0.140151
	unclassified	0.0537761	0.0190387	0.0229757	0	0.0254856	0.0349919	0.0364294	0.0123421	0	0.0142974	0.0302302	0.0491398	0.0333082	0.0385913	0.0243153	0.0189064	0.0289474	0.0256539	0.0143928		0.103871	0.00515609	0.0651541	0.0457204	0.0171629	0.0985712	0.0152016	0.11374	0.0131002	0	0.092198	0.0151666	0.0466649	0.0567504	0.0172183	0.0432364	0.0380597		0.0336155
	result	1	1	1	1	1	1	1	1	1	1	1	1	1	1	1	1	1	1	0.214927		1	1	1	1	1	1	1	1	1	1	1	1	1	1	1	1	0.206044		1
sub role	Energy production and conversion	0.219985	0.201299	0.237936	0.231732	0.3096	0.228678	0.21165	0.154717	0.263105	0.173721	0.300111	0.295904	0.263626	0.202202	0.276339	0.222837	0.303098	0.248532	0.0448873		0.169622	0.202635	0.247624	0.142427	0.231042	0.138532	0.230186	0.200558	0.165182	0.228894	0.188726	0.218732	0.244945	0.168021	0.171794	0.195136	0.0349813		0.224353
	Amino acid transport and metabolism	0.076508	0.249809	0.282575	0.173109	0.123916	0.135607	0.221931	0.118688	0.242839	0.280161	0.16955	0.0869667	0.180425	0.295211	0.139203	0.160826	0.191218	0.180229	0.0662824		0.164471	0.329452	0.18069	0.281773	0.279183	0.200757	0.199555	0.148598	0.313776	0.297592	0.183039	0.193837	0.185275	0.30939	0.274603	0.240621	0.060527		0.207575
	Function unknown	0.0657745	0.22792	0.100208	0.155066	0.142962	0.107221	0.16439	0.230818	0.115122	0.157956	0.133504	0.0721038	0.0944634	0.123624	0.142047	0.166931	0.0992611	0.127915	0.0453209		0.171129	0.119786	0.156654	0.186849	0.14313	0.138695	0.124281	0.168677	0.132895	0.165219	0.150324	0.132458	0.225732	0.177375	0.144135	0.154938	0.0268197		0.140151
	Coenzyme transport and metabolism	0.187843	0.0517036	0.109531	0.175427	0.103279	0.0984536	0.164279	0.0830172	0.112386	0.169553	0.126613	0.127555	0.223208	0.0955544	0.139781	0.109095	0.0844581	0.127825	0.0428997		0.121981	0.0554358	0.0897602	0.0655052	0.106907	0.0742504	0.187947	0.0705993	0.111985	0.0824129	0.113581	0.18128	0.0345418	0.0506078	0.12931	0.102625	0.043099		0.116414
	Translation, ribosomal structure and biogenesis	0.213828	0.0395137	0.035577	0.0730952	0.108471	0.155802	0.0470417	0.0856592	0.0472184	0.0837662	0.0427449	0.151127	0.0624838	0.0775327	0.0373561	0.0449566	0.0809323	0.0856665	0.0485665		0.0897578	0.0488995	0.0616995	0.0265452	0.0256896	0.0736551	0.0737641	0.0803944	0.0242159	0.0313135	0.0598241	0.105028	0.027115	0.0194647	0.0156783	0.0485028	0.0278919		0.0688382
	Posttranslational modification, protein turnover, chaperones	0.0378151	0.105221	0.0826401	0.0299634	0.0758475	0.0526923	0.059516	0.163241	0.102113	0.0292556	0.0918692	0.0540609	0.0502047	0.0915638	0.0899437	0.0609793	0.0661519	0.0700462	0.0323449		0.0304615	0.0660345	0.0330851	0.0815609	0.0373172	0.0447893	0.0555066	0.0363727	0.0708142	0.030332	0.0374116	0.0569669	0.0322367	0.073069	0.0366279	0.0492515	0.0169874		0.06063
	Carbohydrate transport and metabolism	0.0443733	0.0455826	0.0357114	0.0350546	0.0263487	0.0371789	0.0276074	0.0566623	0.0266782	0.0327333	0.03123	0.0263879	0.025242	0.0432034	0.0377934	0.0353626	0.0387613	0.0348104	0.0082041		0.0254741	0.0547762	0.0501754	0.0272381	0.0277684	0.0321262	0.0404129	0.0257594	0.0518863	0.0502153	0.0717406	0.0342437	0.0587443	0.0512081	0.0525775	0.042652	0.0137473		0.0383612
	unclassified	0.0537761	0.0190387	0.0229757	0	0.0254856	0.0349919	0.0364294	0.0123421	0	0.0142974	0.0302302	0.0491398	0.0333082	0.0385913	0.0243153	0.0189064	0.0289474	0.0256539	0.0143928		0.103871	0.00515609	0.0651541	0.0457204	0.0171629	0.0985712	0.0152016	0.11374	0.0131002	0	0.092198	0.0151666	0.0466649	0.0567504	0.0172183	0.0432364	0.0380597		0.0336155
	Replication, recombination and repair	0.0298456	0.0218894	0.0203817	0.0207189	0.050183	0.0301091	0.00512655	0.041254	0.0402469	0.0138781	0.00235394	0.0338582	0.00468731	0.00581439	0.0587797	0.0114036	0.0484721	0.0280812	0.0171254		0.0188341	0.0189993	0.0522331	0.0268288	0.0341629	0.0184721	0.00918291	0.0322674	0.0215689	0.0197031	0.0107057	0.00887945	0.0649855	0.012543	0.0300507	0.024416	0.0153424		0.0264216
	Transcription	0.0130737	0	0	0.0458487	0	0.0255854	0.0105673	0	0.0123546	0	0.00745715	0.0351168	0.00966192	0	0.0147942	0.0569739	0.00714073	0.0145165	0.0167013		0.0473247	0.0436173	0	0.0262236	0.0353281	0.111039	0.0329354	0.0341771	0.0183671	0.0109538	0.0250488	0.0236978	0.0330849	0.0110678	0.0354422	0.0322236	0.0243361		0.0225345
	Lipid transport and metabolism	0.00570019	0.0188234	0.0219033	0	0.00768099	0.0105408	0.00517502	0.0111777	0.0193579	0.0186292	0.0180671	0.0114954	0.00473163	0.00849639	0.00459036	0.0246346	0.0100845	0.0119583	0.00692107		0	0.0237429	0	0.0231434	0.0292886	0	0.0103261	0.0160085	0.0323615	0.0379669	0	0.0119193	0.0154969	0.0255008	0.0437179	0.0199282	0.0139321		0.0155672
	Nucleotide transport and metabolism	0.0242412	0.00746282	0.00516826	0.0411976	0.00431382	0.032421	0.00616623	0.0237495	0	0.0221593	0.0172052	0.0130264	0.0112758	0.0107482	0.00546958	0.0586052	0.0206419	0.0175402	0.0147491		0.0108426	0.00714273	0.00949968	0.00733155	0.0104875	0.0125955	0.00866728	0.0191104	0.0102701	0.0127834	0	0.00358576	0.00924983	0.00645827	0.0105214	0.00925087	0.00417604		0.0137867
	Cell wall/membrane/envelope biogenesis	0.010954	0.00655735	0.0158141	0.00852791	0.00545607	0.0208187	0.00944927	0.010434	0.00692861	0	0.0165623	0.0208963	0.00863967	0	0.00843932	0.0105972	0.0105894	0.0105387	0.00575533		0.00946891	0	0.0142654	0.0216063	0.0127263	0.0290516	0	0.0143487	0.0151332	0.00561621	0.0228501	0	0.0138902	0.0199984	0.0127674	0.0129001	0.00840591		0.0116079
	Inorganic ion transport and metabolism	0.0162831	0.00517899	0.0114263	0	0.0106042	0.0178798	0.0093535	0.00824076	0.0100984	0.00388925	0.00660058	0.0127022	0.00855211	0.00745896	0.00379574	0.00514301	0.0102427	0.00900031	0.00439058		0.00376225	0.0192967	0.00975897	0.0229048	0	0.0147283	0.00657366	0.00981598	0.011256	0.0141312	0.0162711	0.00968725	0	0.0129326	0.0116307	0.0106996	0.00624261		0.00976978
	Defense mechanisms	0	0	0.00902937	0.0102596	0.00585168	0.0055614	0.00740277	0	0	0	0.00590264	0.004469	0.00676851	0	0.00955581	0.0127491	0	0.00463336	0.00425287		0.00301632	0	0.00996238	0.00407914	0.00291754	0	0.00241116	0.0100206	0	0.00355624	0.00387098	0.00199505	0.00514644	0.00359326	0.00292695	0.00337503	0.00292702		0.00406357
	Signal transduction mechanisms	0	0	0.00912215	0	0	0	0.00388308	0	0.00155134	0	0	0	0.00355038	0	0.00779632	0	0	0.00158316	0.00281401		0.00939835	0.00502678	0.0194389	0.00229239	0.00178098	0	0.00304985	0.0195524	0.0016056	0.00217087	0.0120613	0.00252352	0.00289218	0.00201933	0	0.00472289	0.00629692		0.00300488
	Secondary metabolites biosynthesis, transport and catabolism	0	0	0	0	0	0	0	0	0	0	0	0	0	0	0	0	0	0	0		0.0109647	0	0	0	0.00510727	0.0127373	0	0	0	0.00713902	0	0	0	0	0.0109995	0.00317081	0.00471568		0.00143579
	Cell cycle control, cell division, chromosome partitioning	0	0	0	0	0	0.00645903	0.0100313	0	0	0	0	0.00519032	0.00917183	0	0	0	0	0.00147046	0.00340773		0.00962124	0	0	0	0	0	0	0	0	0	0.0123474	0	0	0	0	0.00121915	0.00376697		0.00135666
	Intracellular trafficking, secretion, and vesicular transport	0	0	0	0	0	0	0	0	0	0	0	0	0	0	0	0	0	0	0		0	0	0	0.00797062	0	0	0	0	0.00558267	0	0	0	0	0	0	0.00113219	0.00234451		0.000512673
	result	1	1	1	1	1	1	1	1	1	1	1	1	1	1	1	1	1	1			1	1	1	1	1	1	1	1	1	1	1	1	1	1	1	1			1
